# Supplementary material for: A systematic review of procedural and sampling techniques for cryobiopsy in interstitial lung disease
Source: PubMed Central journal article supplement — Eur Respir Rev. 2024 Aug 14;33(173):240035. doi: 10.1183/16000617.0035-2024 (PMC11322826; doi:10.1183/16000617.0035-2024), 2024-08-14

## Supplementary Figure 1: Diagnostic Yield

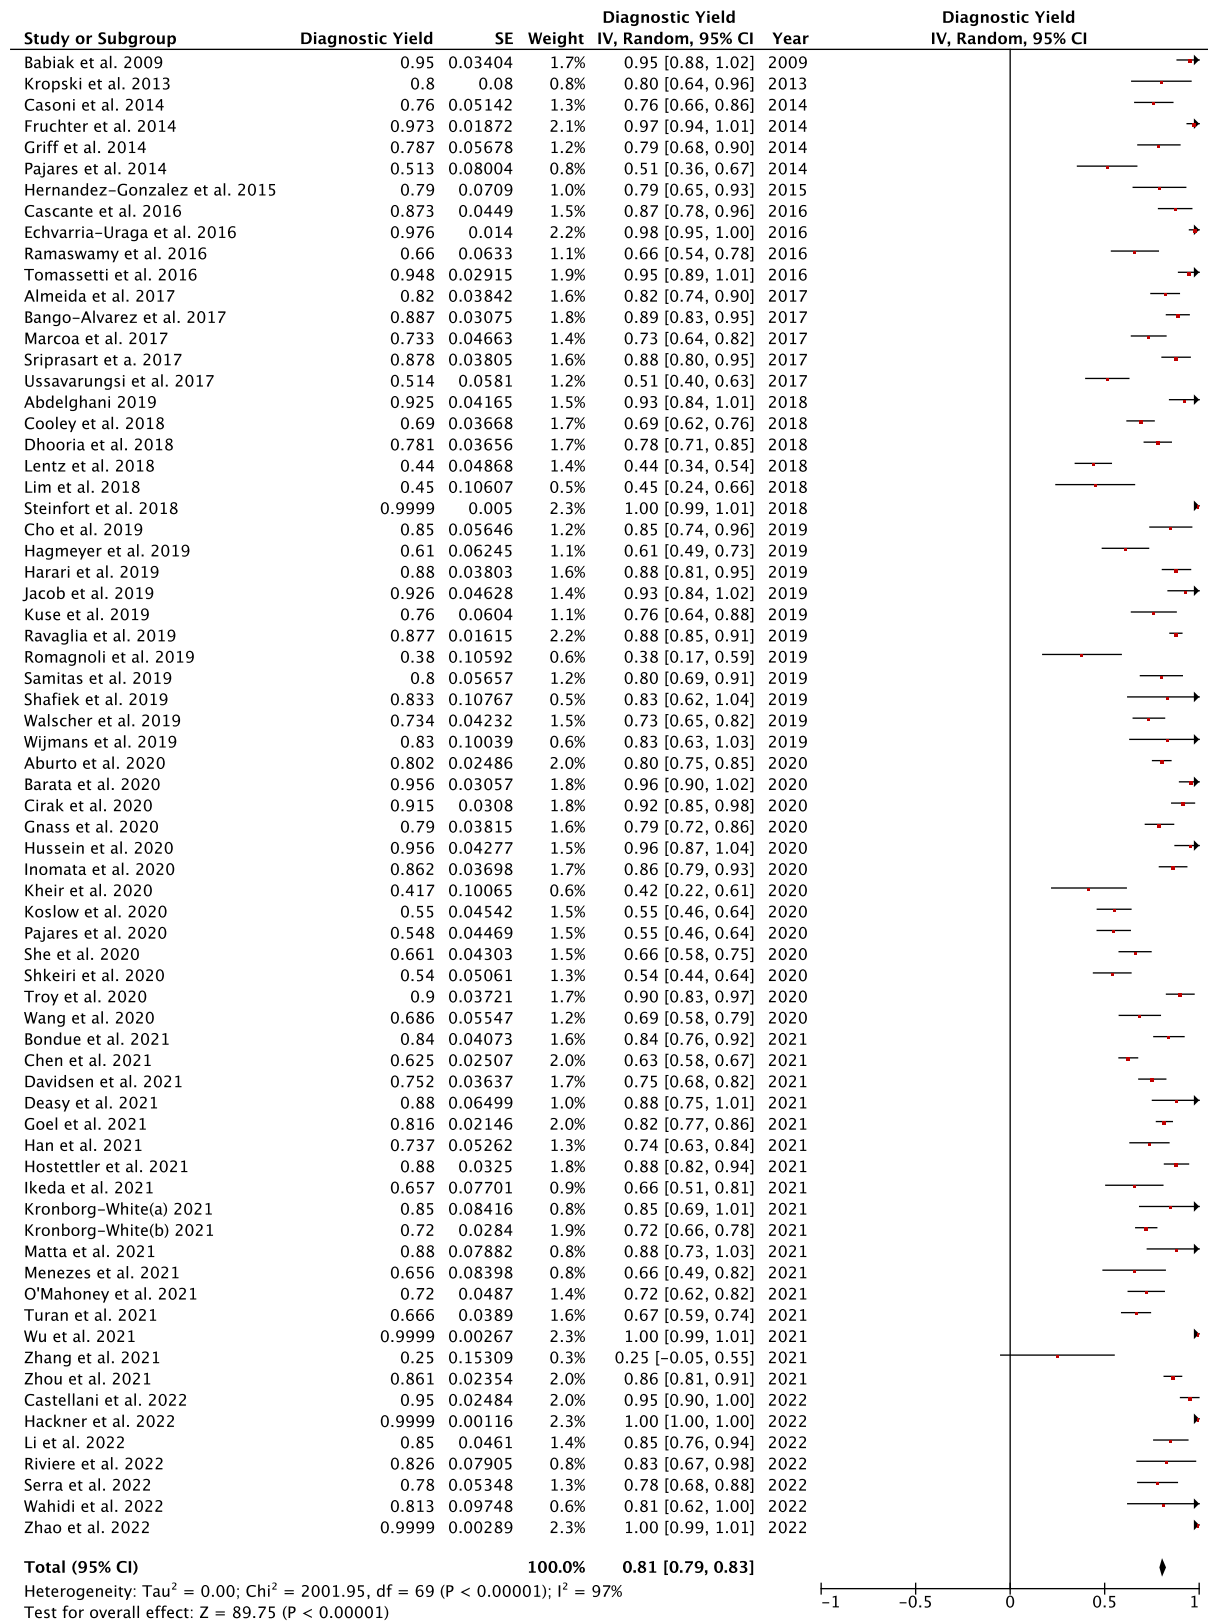

## Supplementary Figure 2: Incidence of Pneumothorax

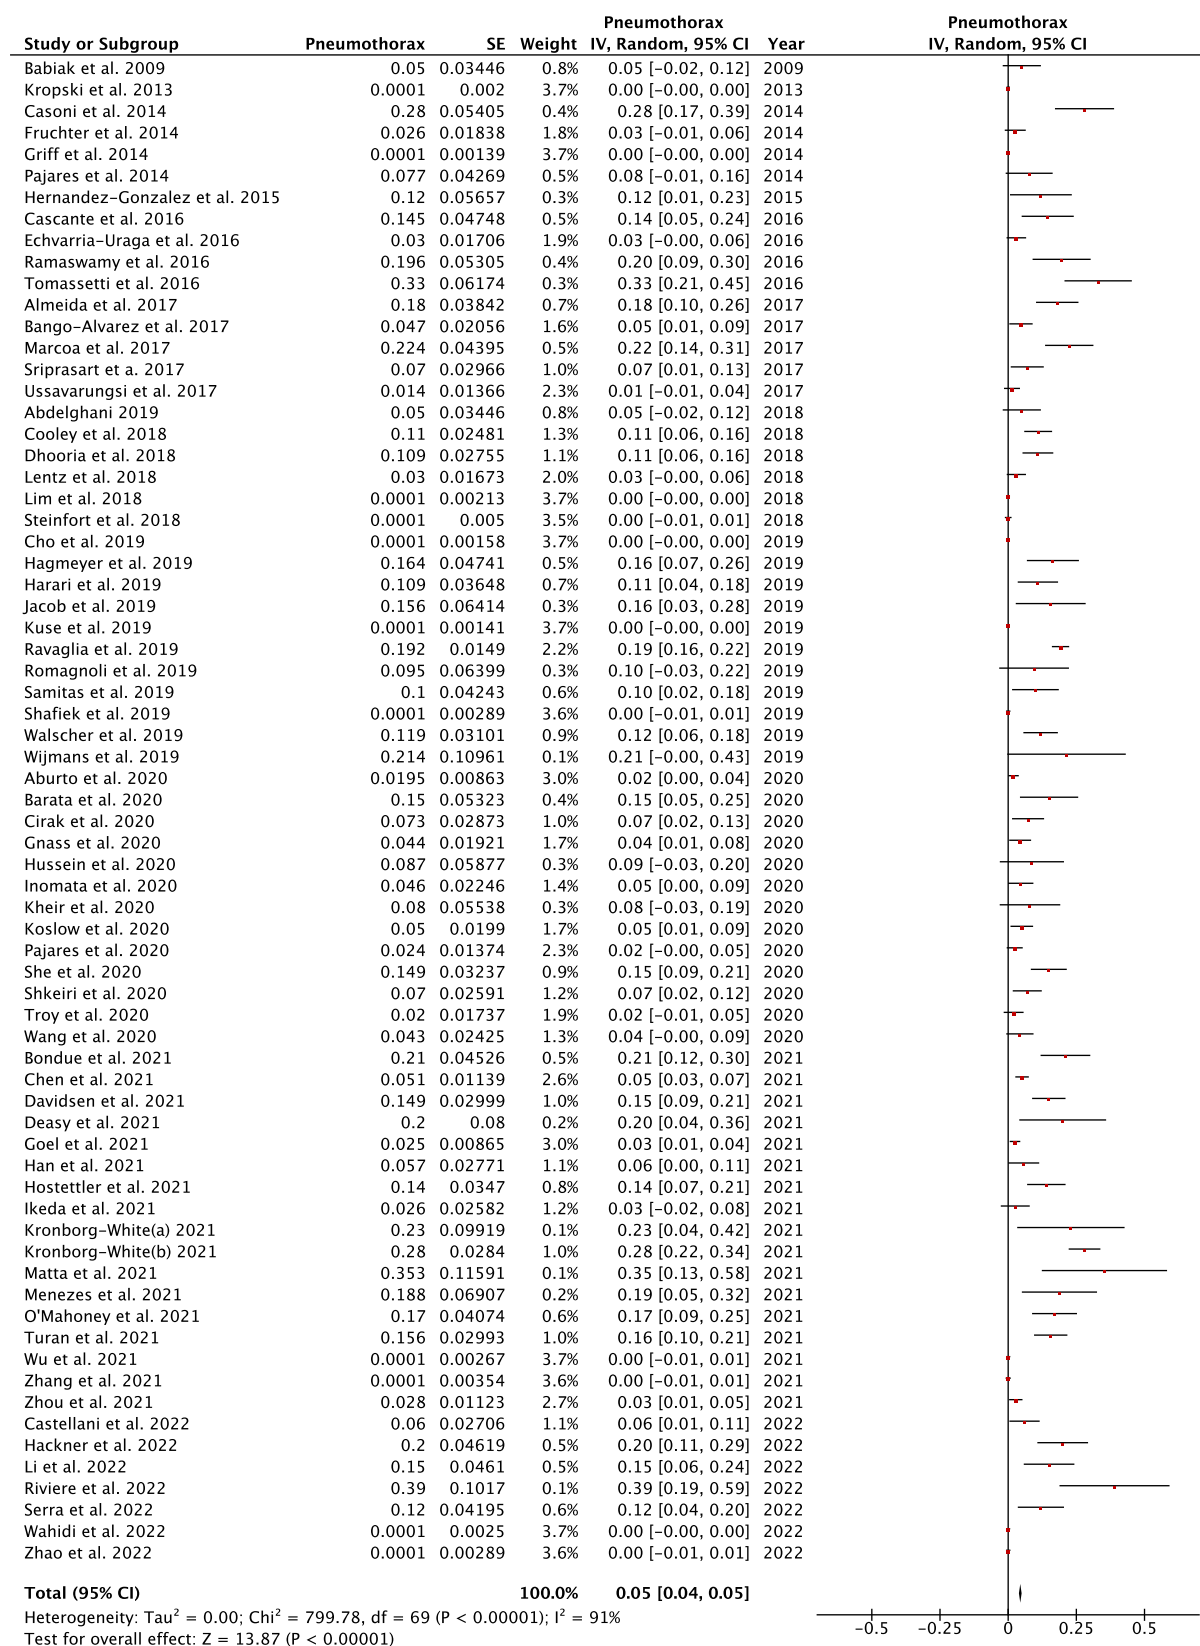

### Supplementary Figure 3: Moderate-severe Bleeding

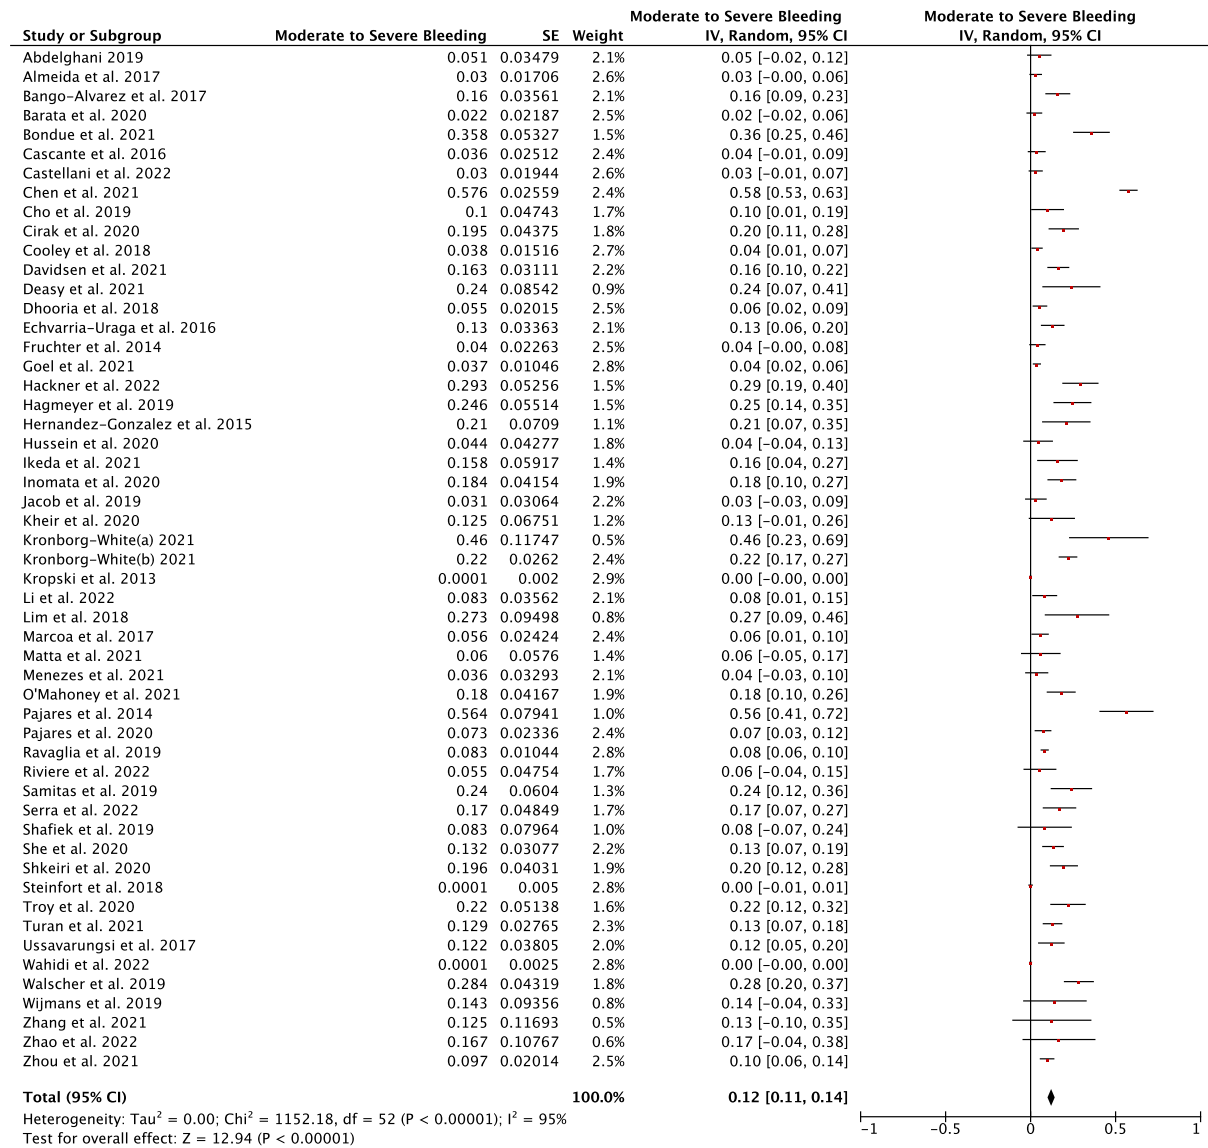

## Supplementary Figure 4: Diagnostic Yield by GA vs sedation

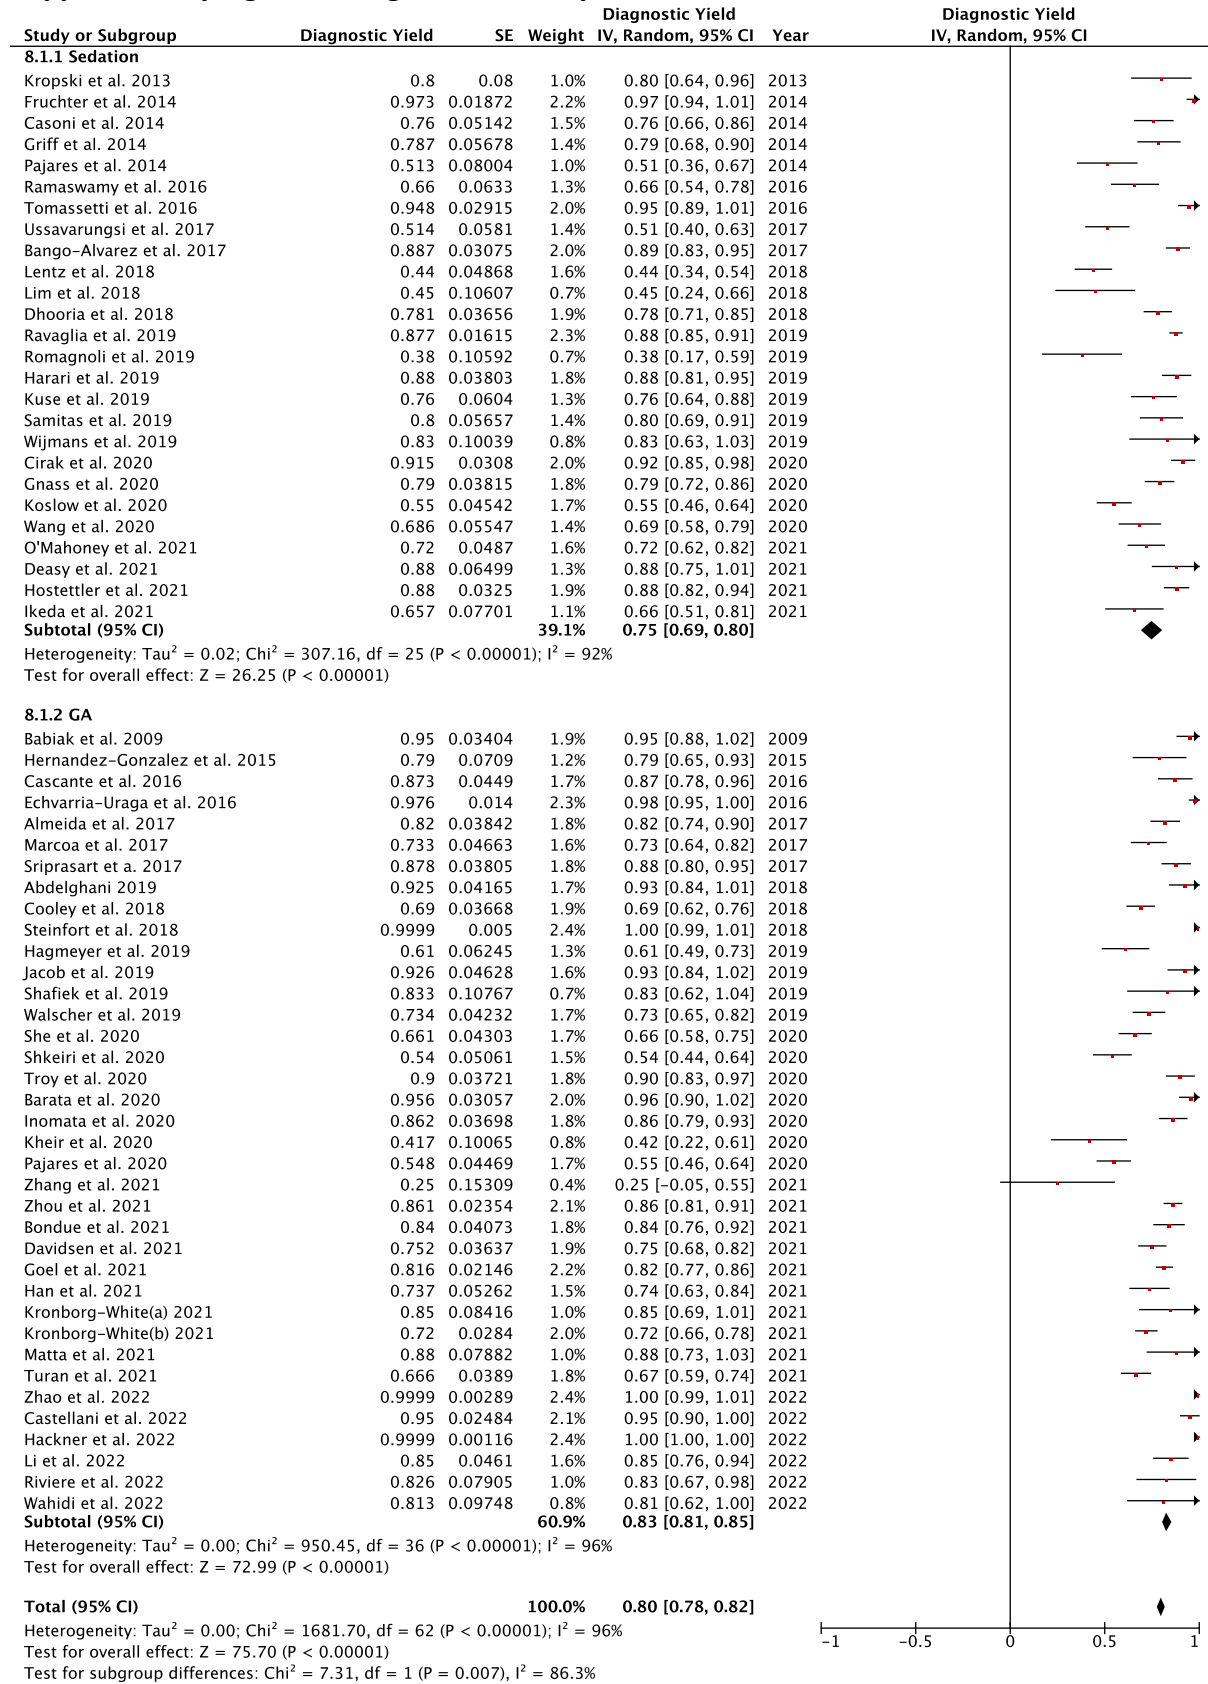



### Supplementary Figure 5: Diagnostic Yield by ILD MDT prior to cryobiopsy vs no MDT

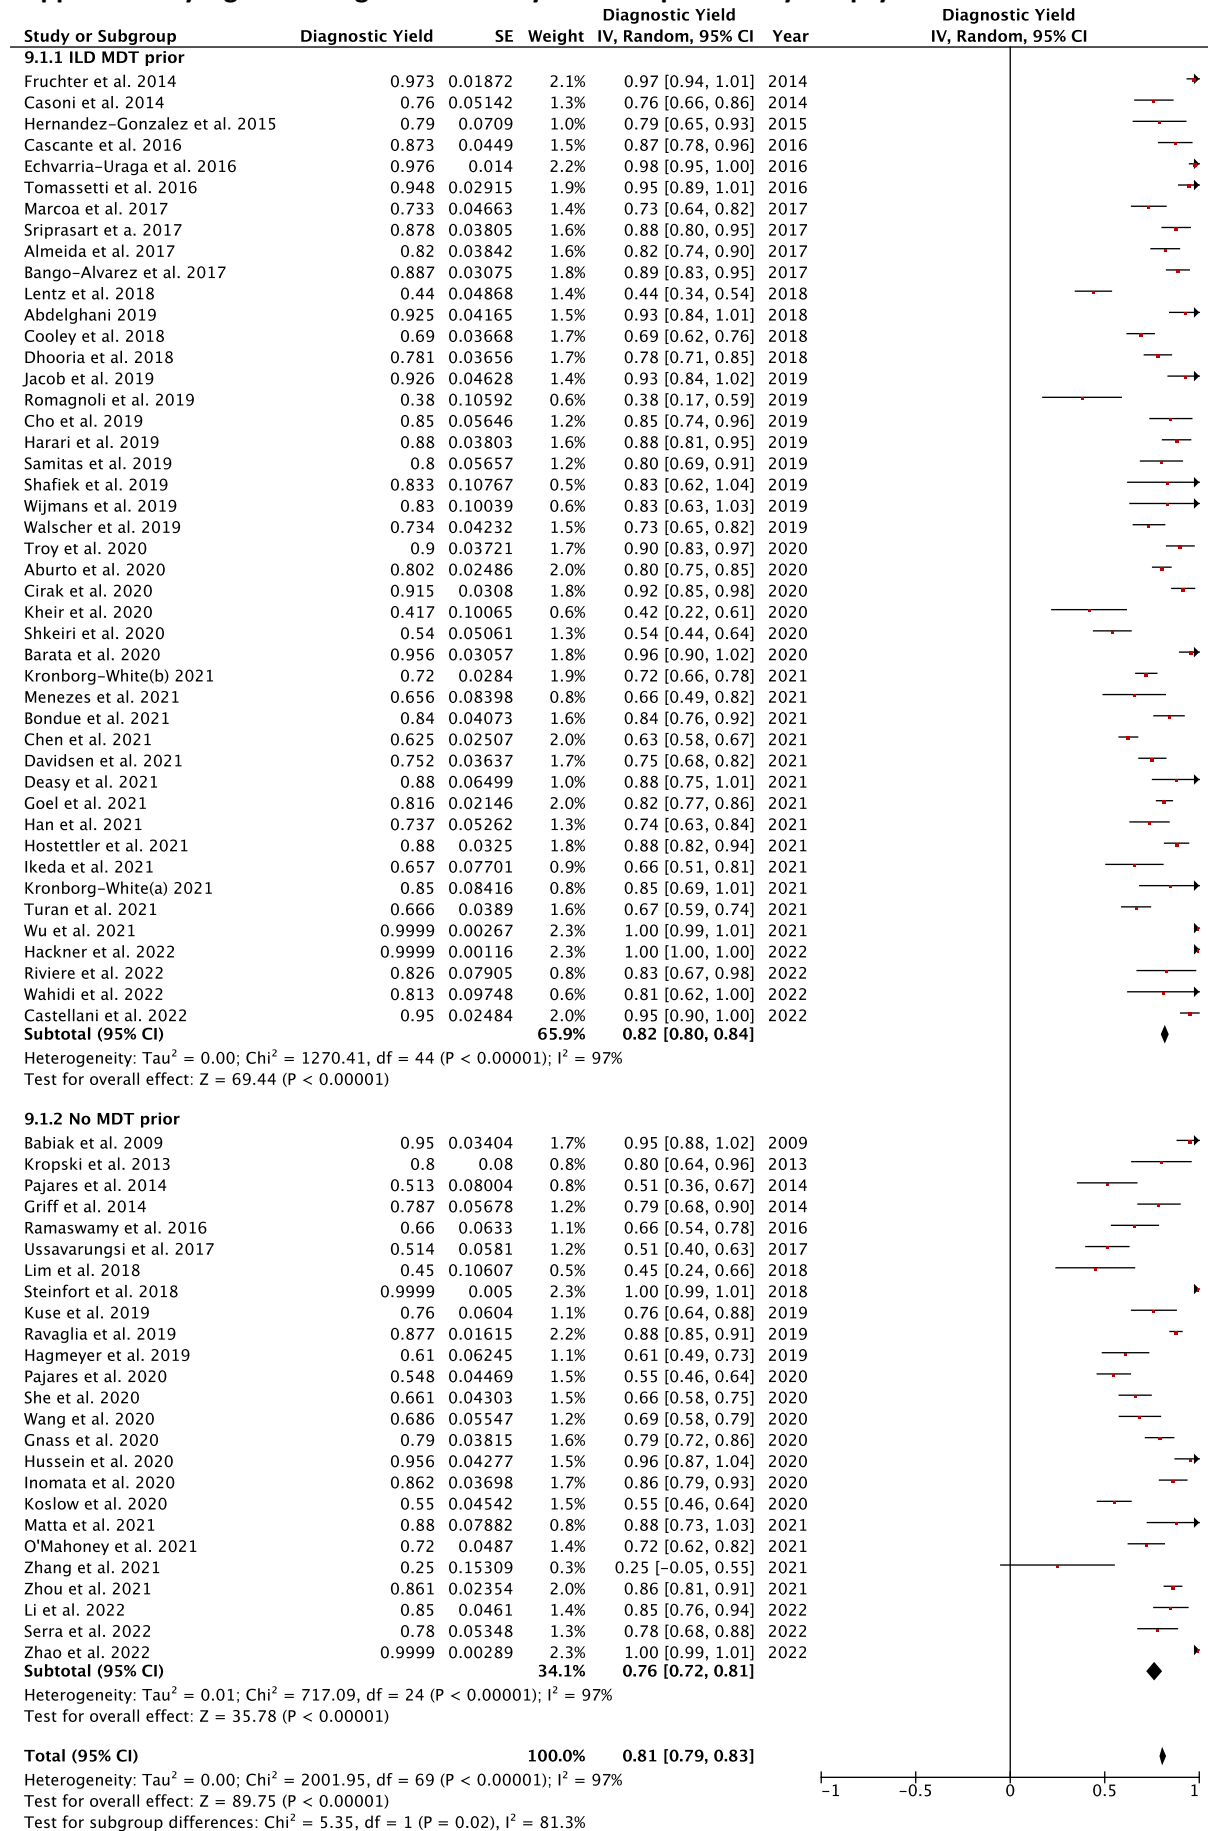

## Supplementary Figure 6: Diagnostic Yield by 2.4mm vs 1.9mm Size Cryoprobe

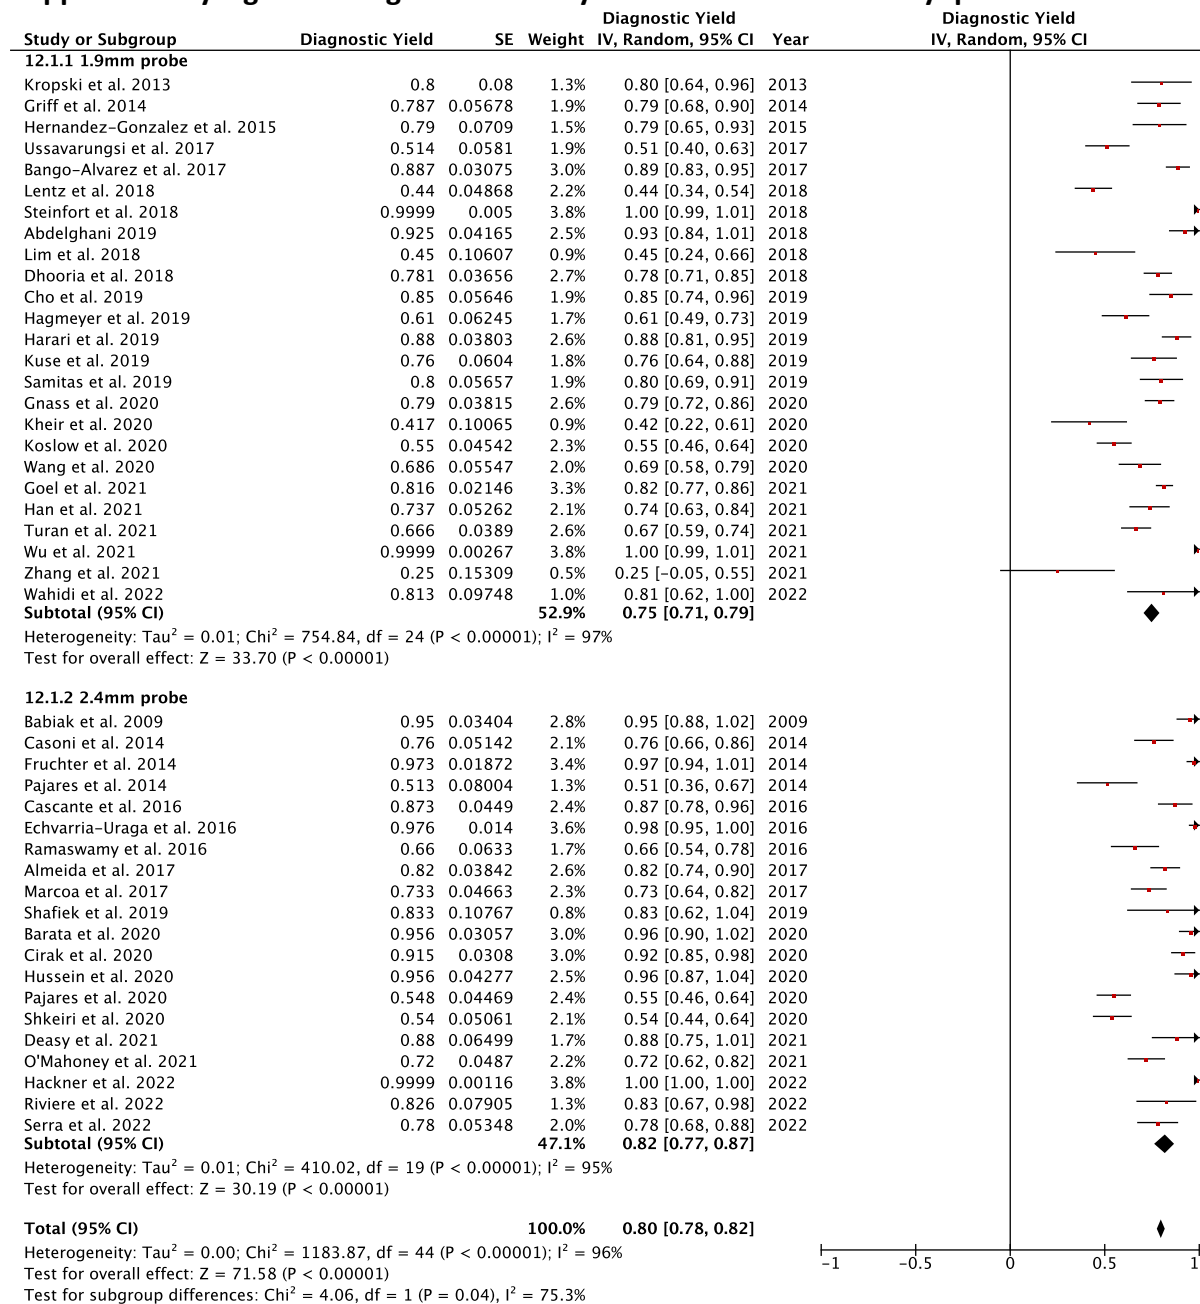

### Supplementary Figure 7: Diagnostic Yield vs Mean Forced Vital Capacity

#### Regression of Point estimate on Mean FVC (% predicted)

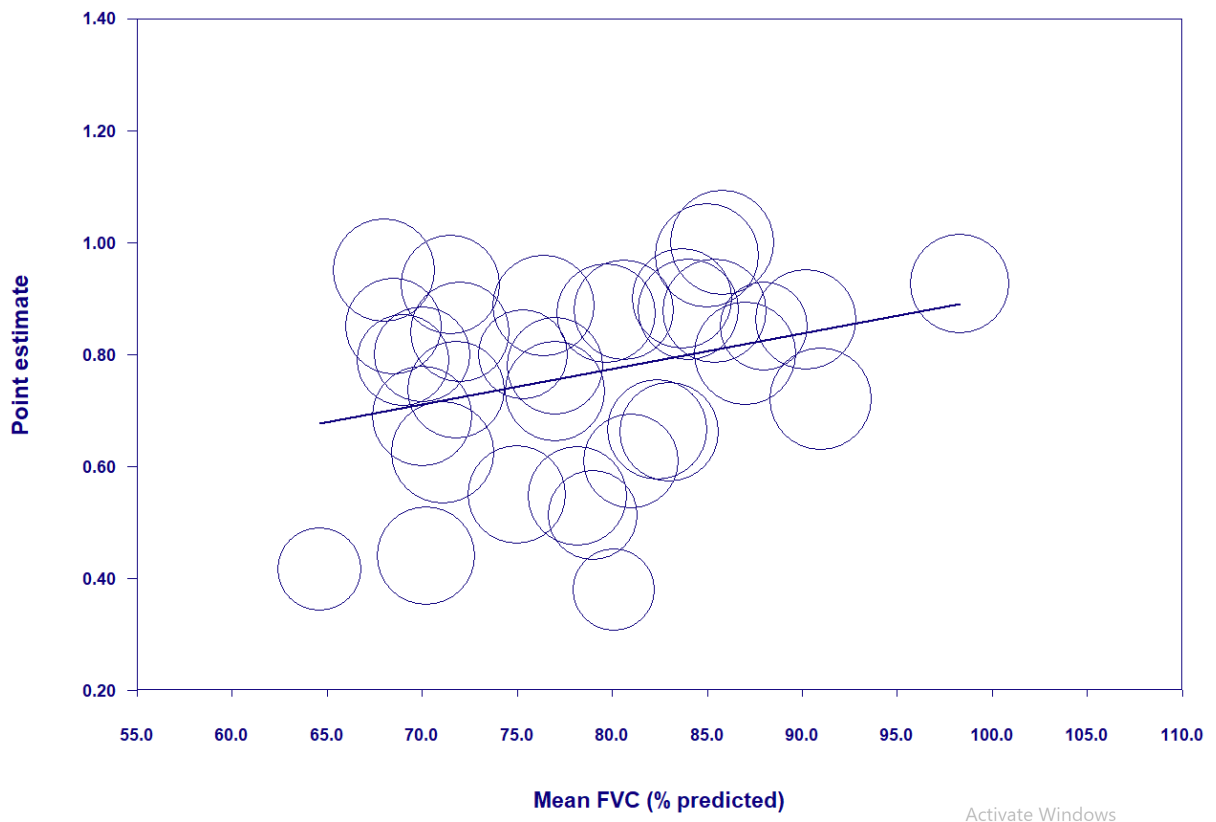

# Supplementary Figure 8: Diagnostic Yield vs Mean Diffusion Capacity for Carbon Monoxide

## Regression of Point estimate on Mean DLCO (% predicted)

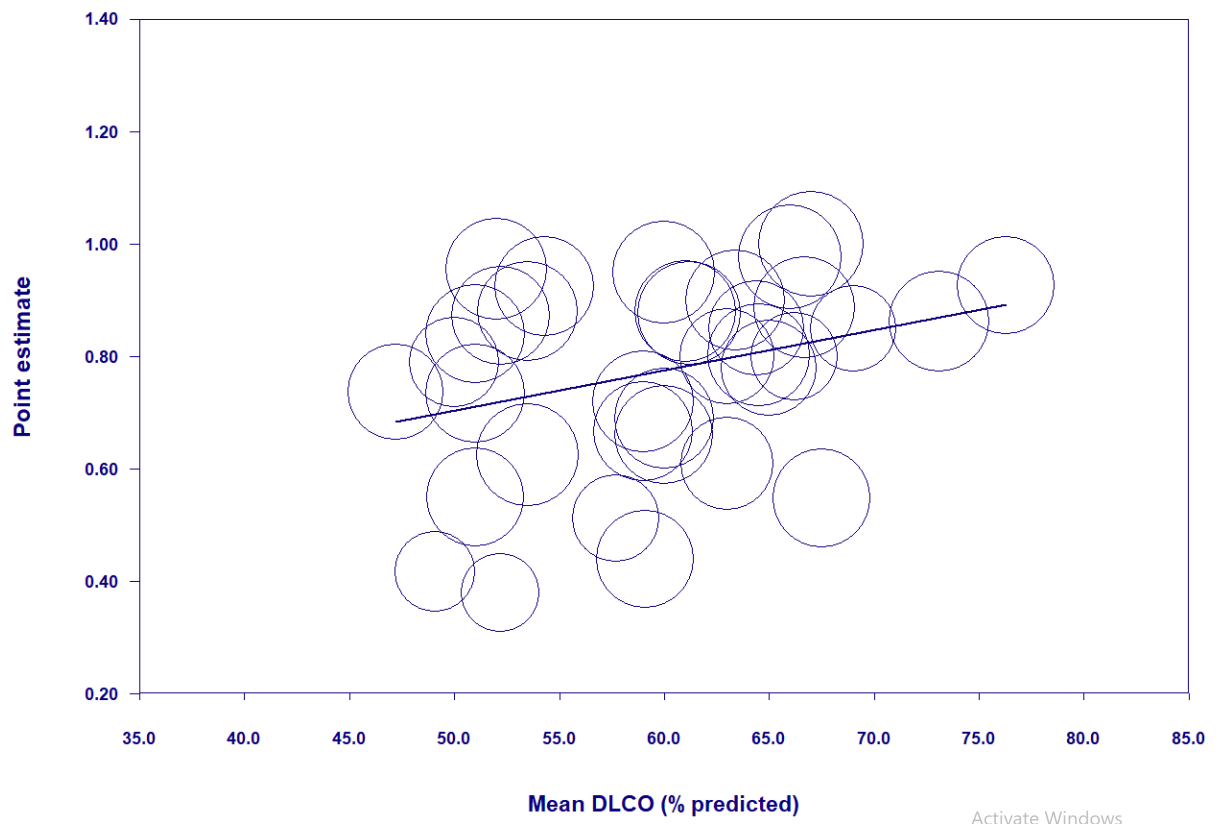

### Supplementary Figure 9: Diagnostic Yield by Single Lobe vs One or More Lobes

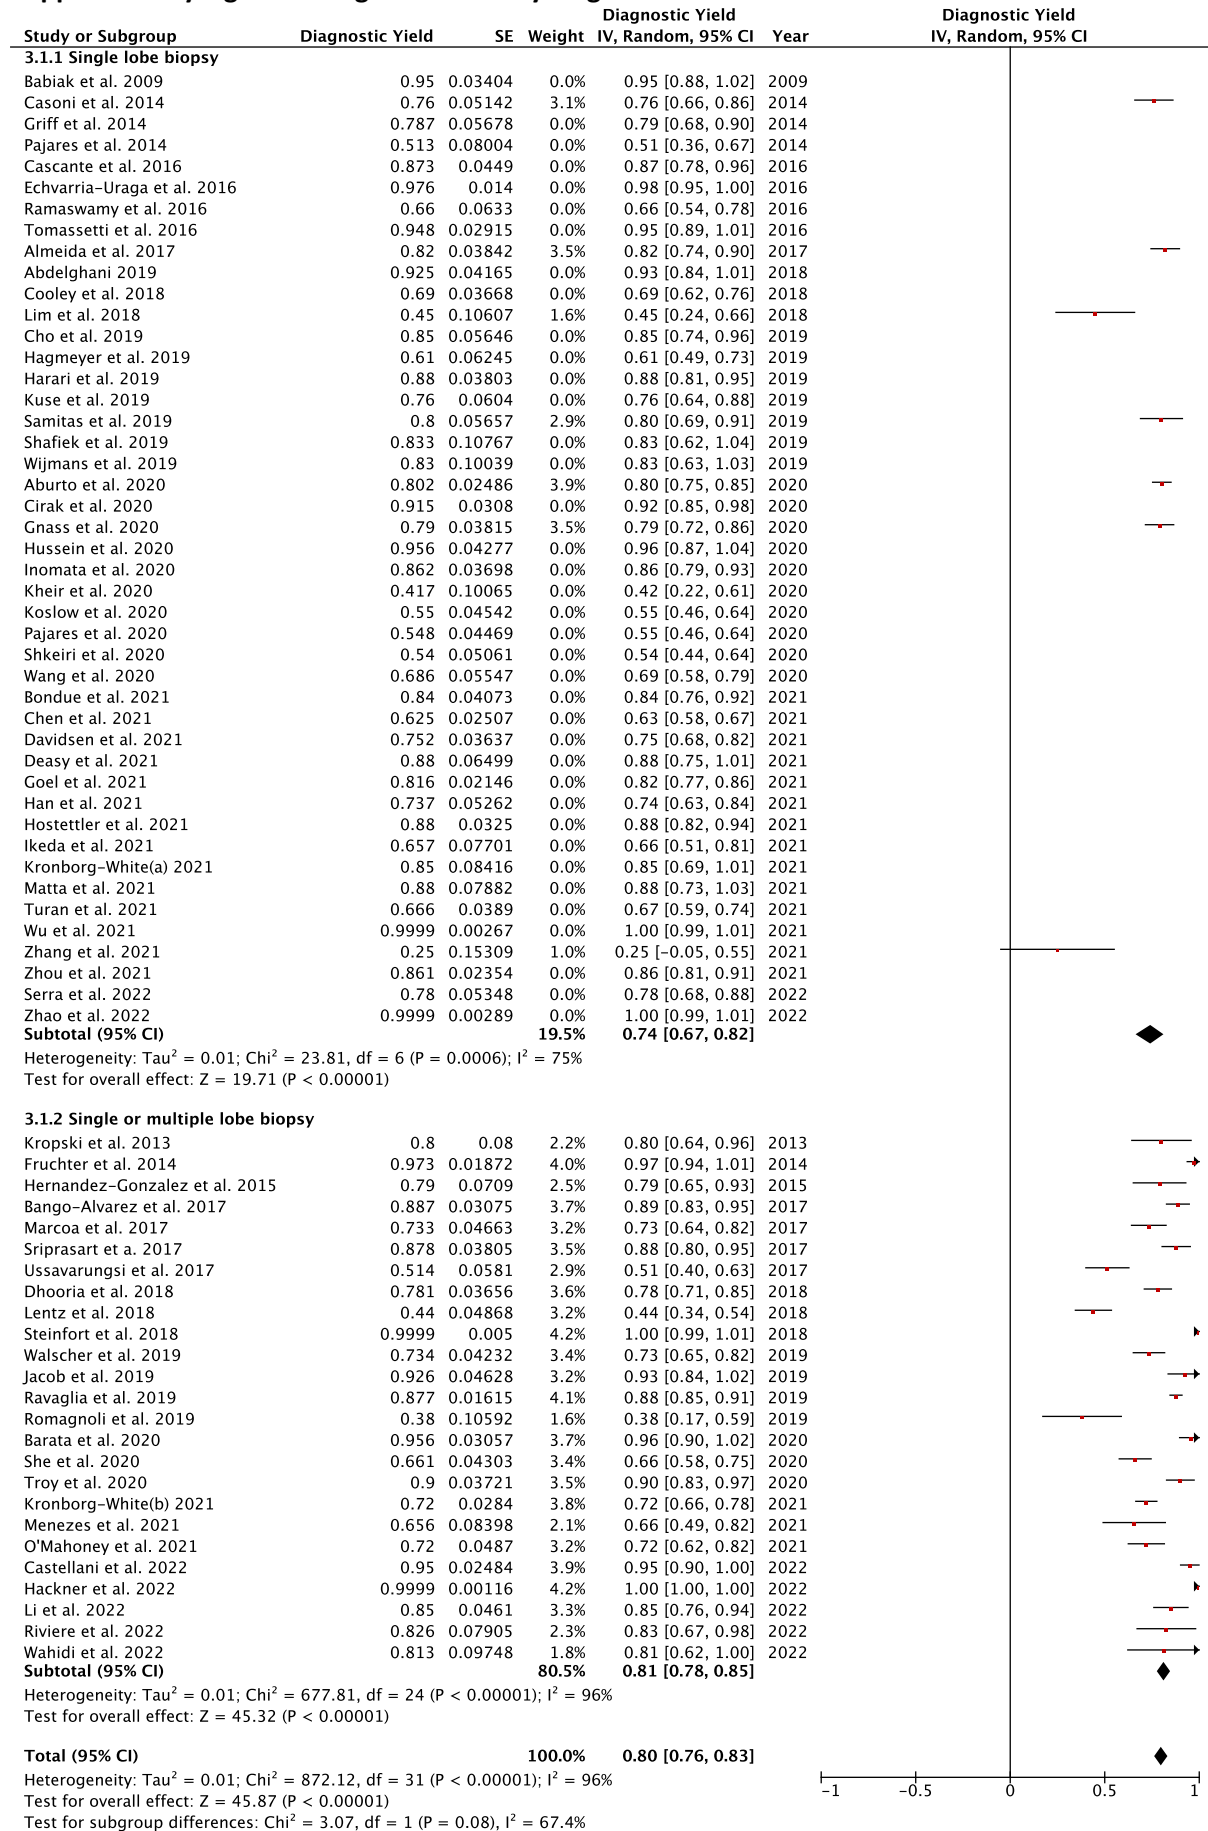

## Supplementary Figure 10: Pneumothorax by 1.9mm vs 2.4mm Cryoprobe Size

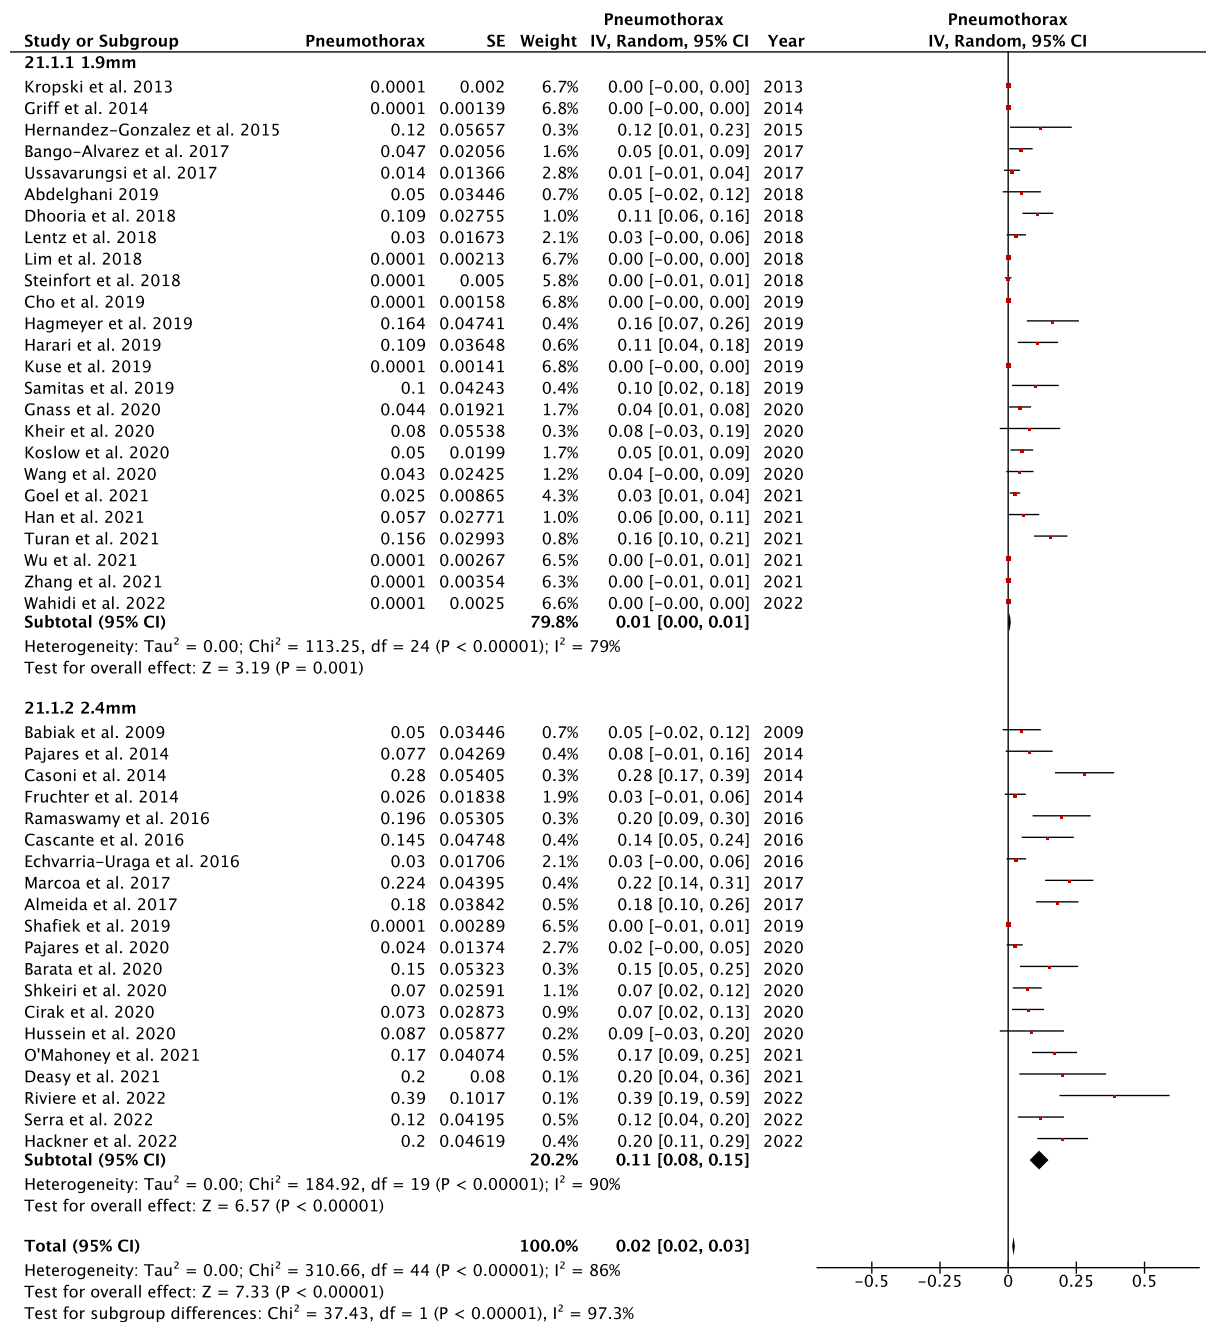



**Supplementary Figure 11: Pneumothorax by Post-Procedure Imaging**

| Study or Subgroup                    | Pneumothorax |         |              |                          | Year | Pneumothorax<br>IV, Random, 95% CI |
|--------------------------------------|--------------|---------|--------------|--------------------------|------|------------------------------------|
|                                      | Pneumothorax | SE      | Weight       | IV, Random, 95% CI       |      |                                    |
| <b>20.1.1 Post-procedure imaging</b> |              |         |              |                          |      |                                    |
| Babiak et al. 2009                   | 0.05         | 0.03446 | 0.8%         | 0.05 [-0.02, 0.12]       | 2009 |                                    |
| Casoni et al. 2014                   | 0.28         | 0.05405 | 0.4%         | 0.28 [0.17, 0.39]        | 2014 |                                    |
| Fruchter et al. 2014                 | 0.026        | 0.01838 | 1.8%         | 0.03 [-0.01, 0.06]       | 2014 |                                    |
| Hernandez-Gonzalez et al. 2015       | 0.12         | 0.05657 | 0.3%         | 0.12 [0.01, 0.23]        | 2015 |                                    |
| Cascante et al. 2016                 | 0.145        | 0.04748 | 0.5%         | 0.14 [0.05, 0.24]        | 2016 |                                    |
| Ramaswamy et al. 2016                | 0.196        | 0.05305 | 0.4%         | 0.20 [0.09, 0.30]        | 2016 |                                    |
| Almeida et al. 2017                  | 0.18         | 0.03842 | 0.7%         | 0.18 [0.10, 0.26]        | 2017 |                                    |
| Bango-Alvarez et al. 2017            | 0.047        | 0.02056 | 1.6%         | 0.05 [0.01, 0.09]        | 2017 |                                    |
| Marcoa et al. 2017                   | 0.224        | 0.04395 | 0.5%         | 0.22 [0.14, 0.31]        | 2017 |                                    |
| Sriprasart et a. 2017                | 0.07         | 0.02966 | 1.0%         | 0.07 [0.01, 0.13]        | 2017 |                                    |
| Abdelghani 2019                      | 0.05         | 0.03446 | 0.8%         | 0.05 [-0.02, 0.12]       | 2018 |                                    |
| Cooley et al. 2018                   | 0.11         | 0.02481 | 1.3%         | 0.11 [0.06, 0.16]        | 2018 |                                    |
| Lim et al. 2018                      | 0.0001       | 0.00213 | 3.7%         | 0.00 [-0.00, 0.00]       | 2018 |                                    |
| Steinfort et al. 2018                | 0.0001       | 0.005   | 3.5%         | 0.00 [-0.01, 0.01]       | 2018 |                                    |
| Harari et al. 2019                   | 0.109        | 0.03648 | 0.7%         | 0.11 [0.04, 0.18]        | 2019 |                                    |
| Jacob et al. 2019                    | 0.156        | 0.06414 | 0.3%         | 0.16 [0.03, 0.28]        | 2019 |                                    |
| Kuse et al. 2019                     | 0.0001       | 0.00141 | 3.7%         | 0.00 [-0.00, 0.00]       | 2019 |                                    |
| Ravaglia et al. 2019                 | 0.192        | 0.0149  | 2.2%         | 0.19 [0.16, 0.22]        | 2019 |                                    |
| Samitas et al. 2019                  | 0.1          | 0.04243 | 0.6%         | 0.10 [0.02, 0.18]        | 2019 |                                    |
| Shafiek et al. 2019                  | 0.0001       | 0.00289 | 3.6%         | 0.00 [-0.01, 0.01]       | 2019 |                                    |
| Walscher et al. 2019                 | 0.119        | 0.03101 | 0.9%         | 0.12 [0.06, 0.18]        | 2019 |                                    |
| Barata et al. 2020                   | 0.15         | 0.05323 | 0.4%         | 0.15 [0.05, 0.25]        | 2020 |                                    |
| Cirak et al. 2020                    | 0.073        | 0.02873 | 1.0%         | 0.07 [0.02, 0.13]        | 2020 |                                    |
| Gnass et al. 2020                    | 0.044        | 0.01921 | 1.7%         | 0.04 [0.01, 0.08]        | 2020 |                                    |
| Hussein et al. 2020                  | 0.087        | 0.05877 | 0.3%         | 0.09 [-0.03, 0.20]       | 2020 |                                    |
| Pajares et al. 2020                  | 0.024        | 0.01374 | 2.3%         | 0.02 [-0.00, 0.05]       | 2020 |                                    |
| Shkeiri et al. 2020                  | 0.07         | 0.02591 | 1.2%         | 0.07 [0.02, 0.12]        | 2020 |                                    |
| Troy et al. 2020                     | 0.02         | 0.01737 | 1.9%         | 0.02 [-0.01, 0.05]       | 2020 |                                    |
| Davidson et al. 2021                 | 0.149        | 0.02999 | 1.0%         | 0.15 [0.09, 0.21]        | 2021 |                                    |
| Deasy et al. 2021                    | 0.2          | 0.08    | 0.2%         | 0.20 [0.04, 0.36]        | 2021 |                                    |
| Goel et al. 2021                     | 0.025        | 0.00865 | 3.0%         | 0.03 [0.01, 0.04]        | 2021 |                                    |
| Hostettler et al. 2021               | 0.14         | 0.0347  | 0.8%         | 0.14 [0.07, 0.21]        | 2021 |                                    |
| Kronborg-White(a) 2021               | 0.23         | 0.09919 | 0.1%         | 0.23 [0.04, 0.42]        | 2021 |                                    |
| Kronborg-White(b) 2021               | 0.28         | 0.0284  | 1.0%         | 0.28 [0.22, 0.34]        | 2021 |                                    |
| Matta et al. 2021                    | 0.353        | 0.11591 | 0.1%         | 0.35 [0.13, 0.58]        | 2021 |                                    |
| Menezes et al. 2021                  | 0.188        | 0.06907 | 0.2%         | 0.19 [0.05, 0.32]        | 2021 |                                    |
| O'Mahoney et al. 2021                | 0.17         | 0.04074 | 0.6%         | 0.17 [0.09, 0.25]        | 2021 |                                    |
| Turan et al. 2021                    | 0.156        | 0.02993 | 1.0%         | 0.16 [0.10, 0.21]        | 2021 |                                    |
| Zhang et al. 2021                    | 0.0001       | 0.00354 | 3.6%         | 0.00 [-0.01, 0.01]       | 2021 |                                    |
| Zhou et al. 2021                     | 0.028        | 0.01123 | 2.7%         | 0.03 [0.01, 0.05]        | 2021 |                                    |
| Castellani et al. 2022               | 0.06         | 0.02706 | 1.1%         | 0.06 [0.01, 0.11]        | 2022 |                                    |
| Hackner et al. 2022                  | 0.2          | 0.04619 | 0.5%         | 0.20 [0.11, 0.29]        | 2022 |                                    |
| Li et al. 2022                       | 0.15         | 0.0461  | 0.5%         | 0.15 [0.06, 0.24]        | 2022 |                                    |
| Zhao et al. 2022                     | 0.0001       | 0.00289 | 3.6%         | 0.00 [-0.01, 0.01]       | 2022 |                                    |
| <b>Subtotal (95% CI)</b>             |              |         | <b>57.9%</b> | <b>0.07 [0.06, 0.08]</b> |      |                                    |

Heterogeneity: Tau<sup>2</sup> = 0.00; Chi<sup>2</sup> = 614.03, df = 43 (P < 0.00001); I<sup>2</sup> = 93%  
 Test for overall effect: Z = 12.50 (P < 0.00001)

**20.1.2 No imaging**

|                             |        |         |              |                          |      |  |
|-----------------------------|--------|---------|--------------|--------------------------|------|--|
| Kropski et al. 2013         | 0.0001 | 0.002   | 3.7%         | 0.00 [-0.00, 0.00]       | 2013 |  |
| Griff et al. 2014           | 0.0001 | 0.00139 | 3.7%         | 0.00 [-0.00, 0.00]       | 2014 |  |
| Pajares et al. 2014         | 0.077  | 0.04269 | 0.5%         | 0.08 [-0.01, 0.16]       | 2014 |  |
| Echvarria-Uruga et al. 2016 | 0.03   | 0.01706 | 1.9%         | 0.03 [-0.00, 0.06]       | 2016 |  |
| Tomasseti et al. 2016       | 0.33   | 0.06174 | 0.3%         | 0.33 [0.21, 0.45]        | 2016 |  |
| Ussavarungsi et al. 2017    | 0.014  | 0.01366 | 2.3%         | 0.01 [-0.01, 0.04]       | 2017 |  |
| Dhooira et al. 2018         | 0.109  | 0.02755 | 1.1%         | 0.11 [0.06, 0.16]        | 2018 |  |
| Lentz et al. 2018           | 0.03   | 0.01673 | 2.0%         | 0.03 [-0.00, 0.06]       | 2018 |  |
| Hagmeyer et al. 2019        | 0.164  | 0.04741 | 0.5%         | 0.16 [0.07, 0.26]        | 2019 |  |
| Romagnoli et al. 2019       | 0.095  | 0.06399 | 0.3%         | 0.10 [-0.03, 0.22]       | 2019 |  |
| Wijmans et al. 2019         | 0.214  | 0.10961 | 0.1%         | 0.21 [-0.00, 0.43]       | 2019 |  |
| Cho et al. 2019             | 0.0001 | 0.00158 | 3.7%         | 0.00 [-0.00, 0.00]       | 2019 |  |
| Inomata et al. 2020         | 0.046  | 0.02246 | 1.4%         | 0.05 [0.00, 0.09]        | 2020 |  |
| Kheir et al. 2020           | 0.08   | 0.05538 | 0.3%         | 0.08 [-0.03, 0.19]       | 2020 |  |
| Koslow et al. 2020          | 0.05   | 0.0199  | 1.7%         | 0.05 [0.01, 0.09]        | 2020 |  |
| She et al. 2020             | 0.149  | 0.03237 | 0.9%         | 0.15 [0.09, 0.21]        | 2020 |  |
| Wang et al. 2020            | 0.043  | 0.02425 | 1.3%         | 0.04 [-0.00, 0.09]       | 2020 |  |
| Aburto et al. 2020          | 0.0195 | 0.00863 | 3.0%         | 0.02 [0.00, 0.04]        | 2020 |  |
| Han et al. 2021             | 0.057  | 0.02771 | 1.1%         | 0.06 [0.00, 0.11]        | 2021 |  |
| Ikeda et al. 2021           | 0.026  | 0.02582 | 1.2%         | 0.03 [-0.02, 0.08]       | 2021 |  |
| Wu et al. 2021              | 0.0001 | 0.00267 | 3.7%         | 0.00 [-0.01, 0.01]       | 2021 |  |
| Bondue et al. 2021          | 0.21   | 0.04526 | 0.5%         | 0.21 [0.12, 0.30]        | 2021 |  |
| Chen et al. 2021            | 0.051  | 0.01139 | 2.6%         | 0.05 [0.03, 0.07]        | 2021 |  |
| Riviere et al. 2022         | 0.39   | 0.1017  | 0.1%         | 0.39 [0.19, 0.59]        | 2022 |  |
| Serra et al. 2022           | 0.12   | 0.04195 | 0.6%         | 0.12 [0.04, 0.20]        | 2022 |  |
| Wahidi et al. 2022          | 0.0001 | 0.0025  | 3.7%         | 0.00 [-0.00, 0.00]       | 2022 |  |
| <b>Subtotal (95% CI)</b>    |        |         | <b>42.1%</b> | <b>0.02 [0.02, 0.03]</b> |      |  |

Heterogeneity: Tau<sup>2</sup> = 0.00; Chi<sup>2</sup> = 181.22, df = 25 (P < 0.00001); I<sup>2</sup> = 86%  
 Test for overall effect: Z = 5.90 (P < 0.00001)

**Total (95% CI)** **100.0%** **0.05 [0.04, 0.05]**

Heterogeneity: Tau<sup>2</sup> = 0.00; Chi<sup>2</sup> = 799.78, df = 69 (P < 0.00001); I<sup>2</sup> = 91%  
 Test for overall effect: Z = 13.87 (P < 0.00001)  
 Test for subgroup differences: Chi<sup>2</sup> = 48.35, df = 1 (P < 0.00001), I<sup>2</sup> = 97.9%

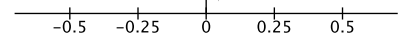

## Supplementary Figure 12: Pneumothorax by Single vs One or More Lobes

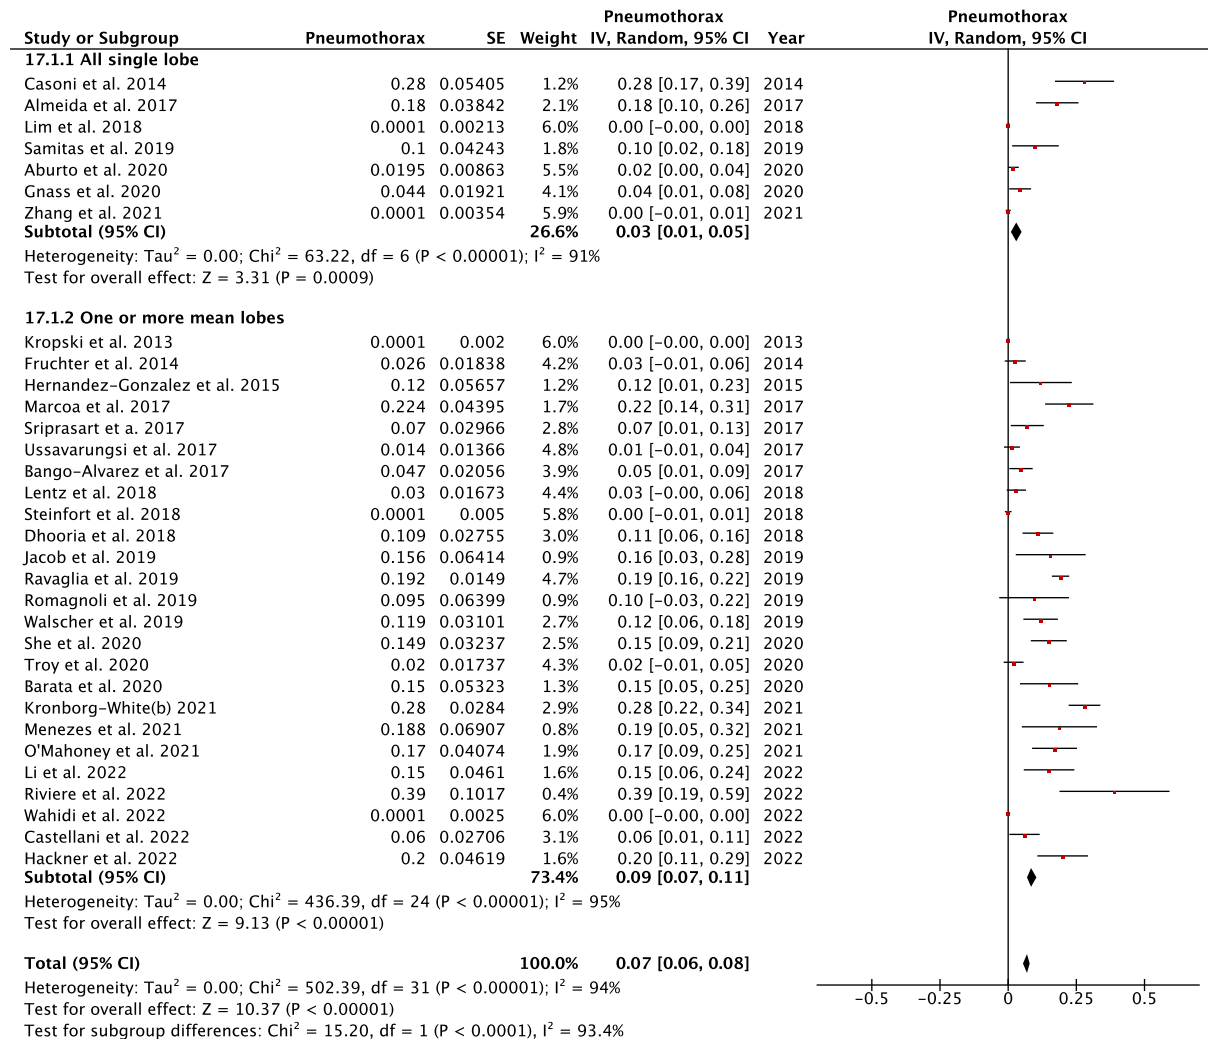

### Supplementary Figure 13: Pneumothorax by Mean Diffusion Capacity for Carbon Monoxide

Regression of Point estimate on Mean DLCO (% predicted)

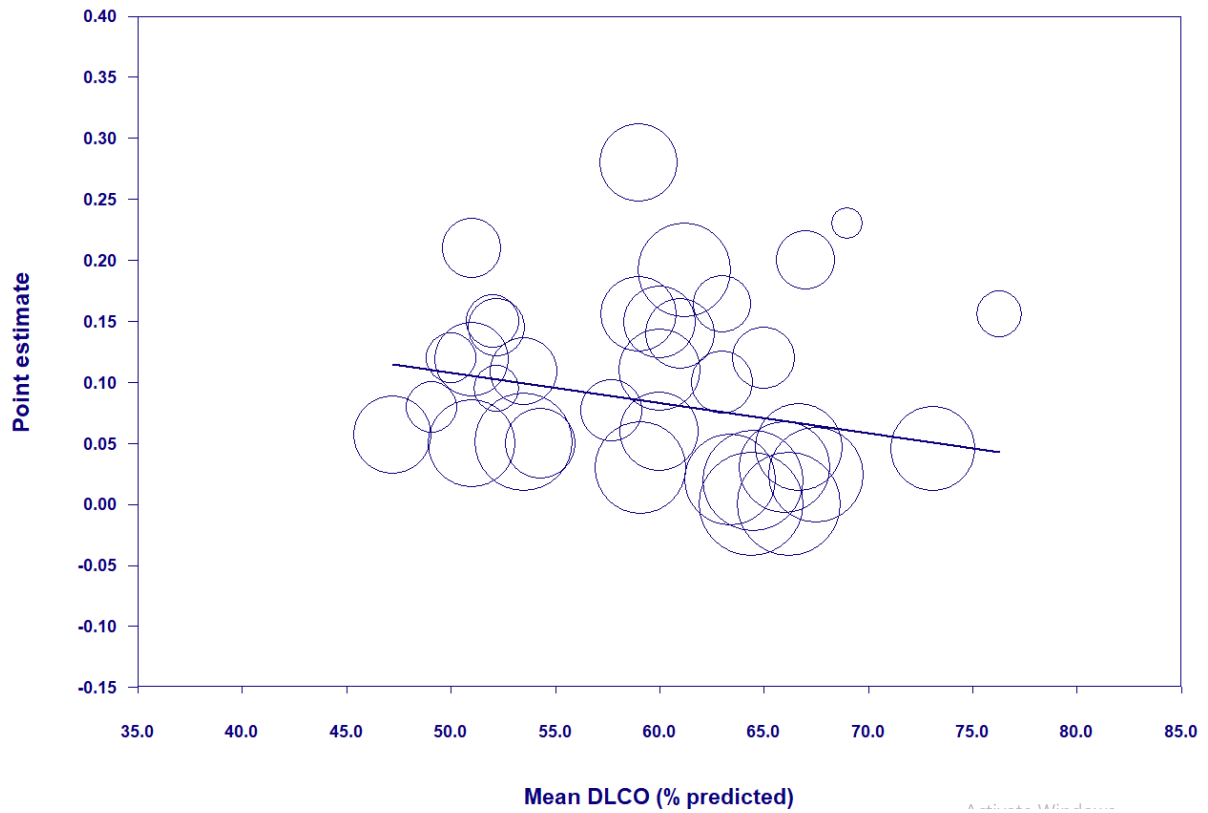

## Supplementary Figure 14: Pneumothorax by General Anaesthesia vs Sedation

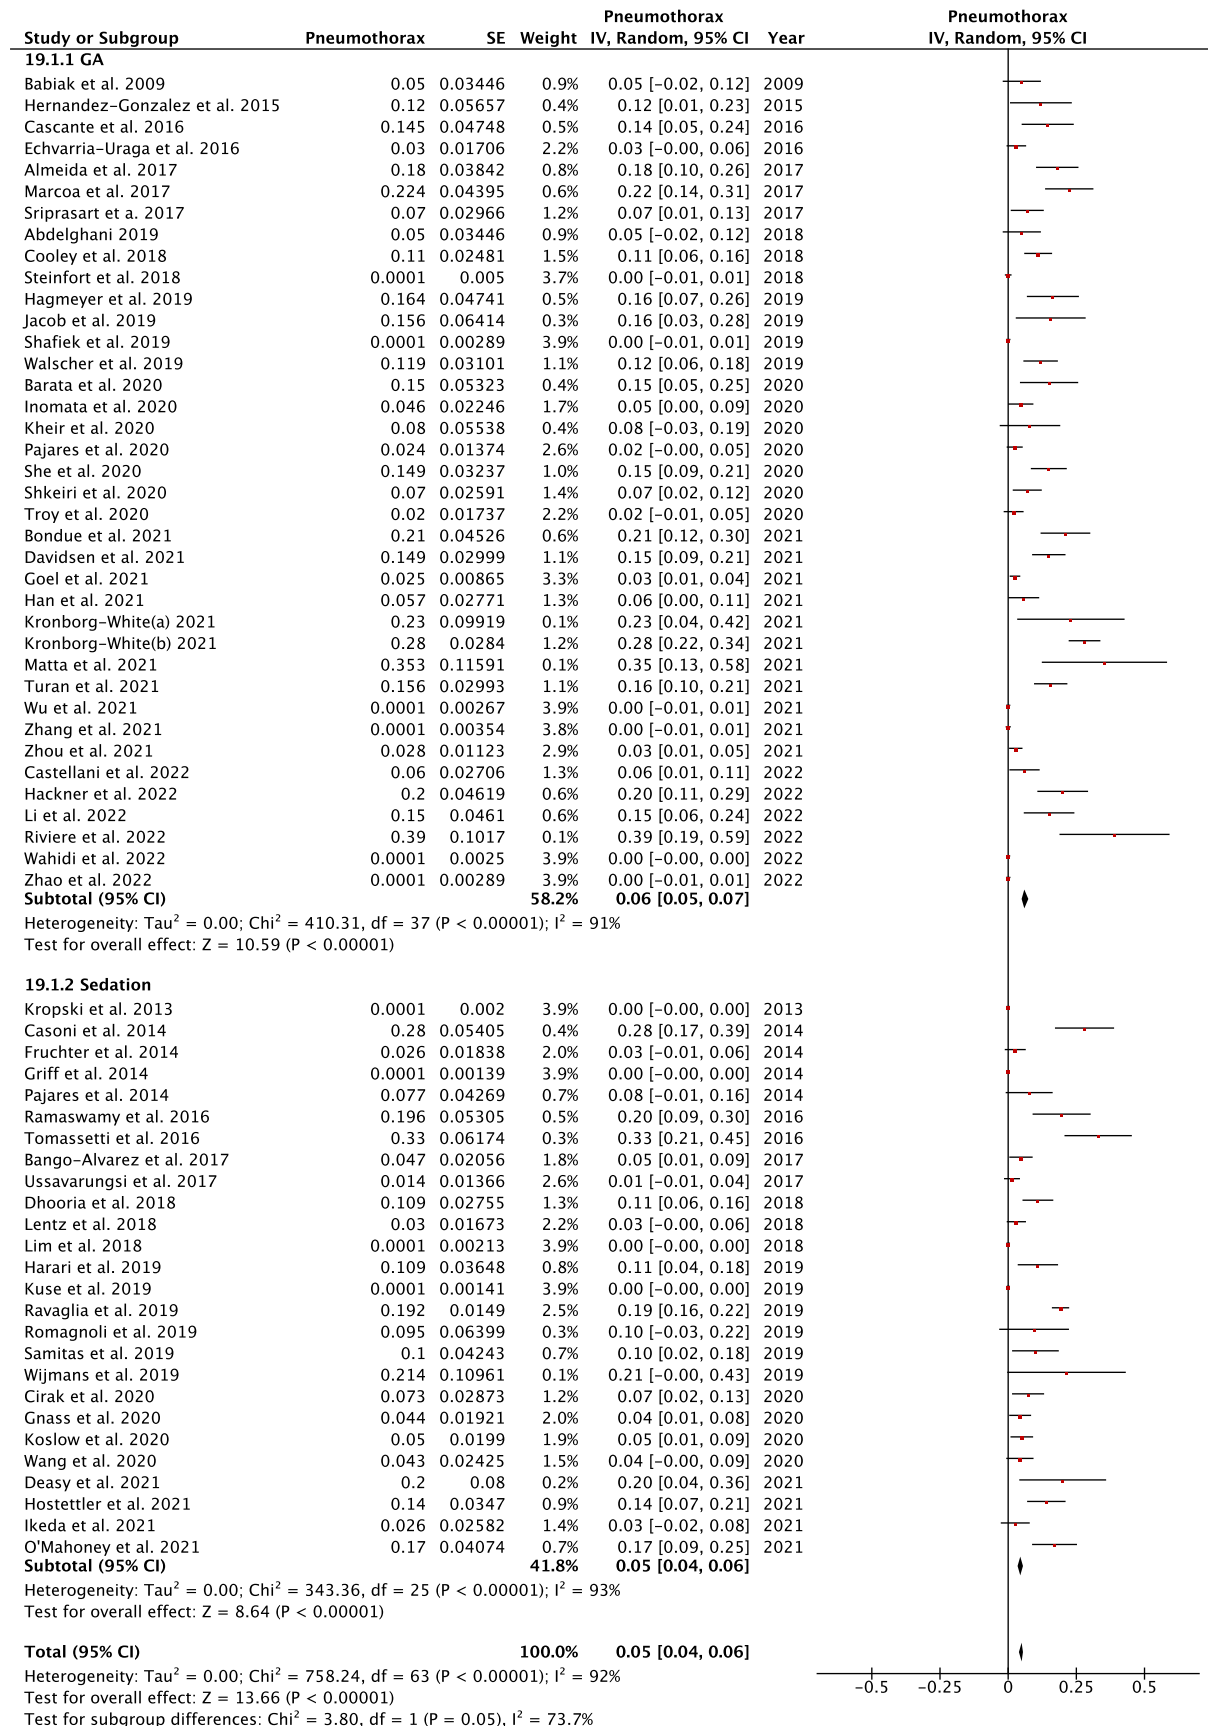

### Supplementary Figure 15: Pneumothorax by Age

Regression of Point estimate on Age

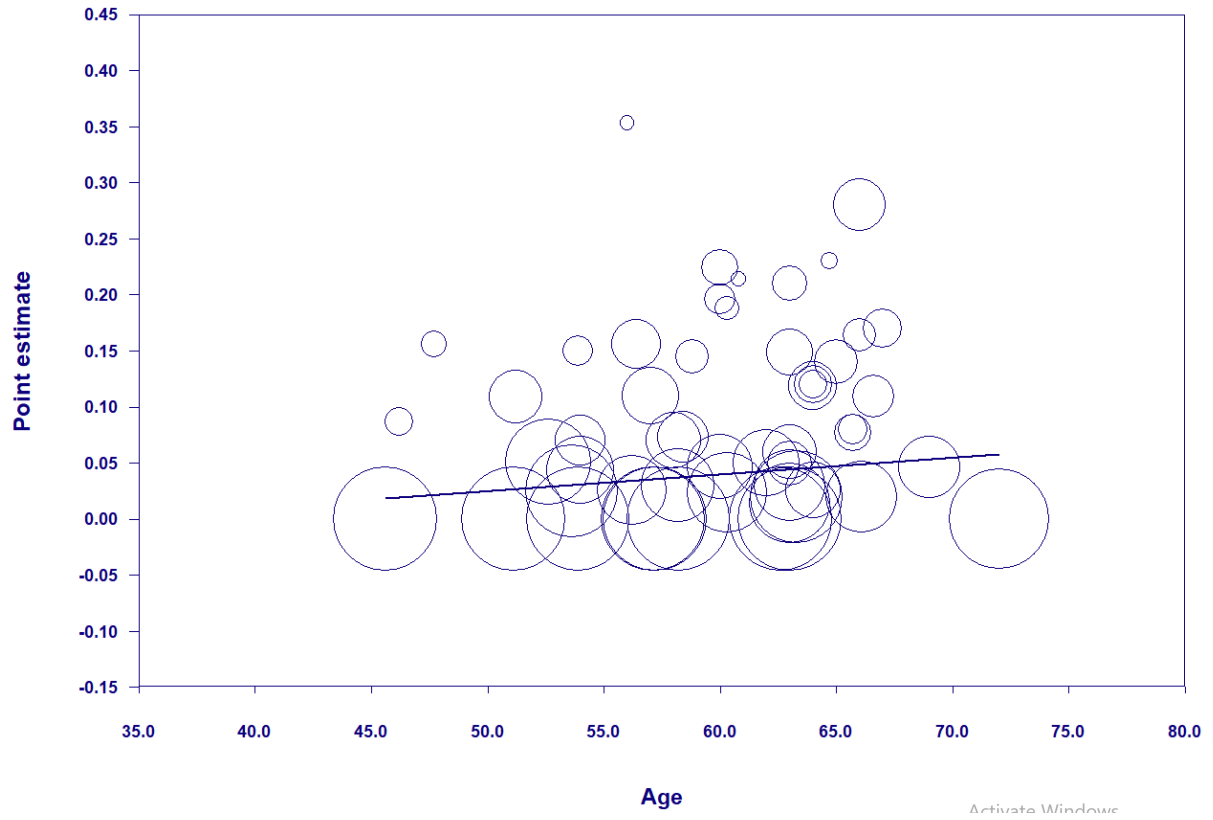



### Supplementary Figure 16: Pneumothorax by Mean Forced Vital Capacity

#### Regression of Point estimate on Mean FVC (% predicted)

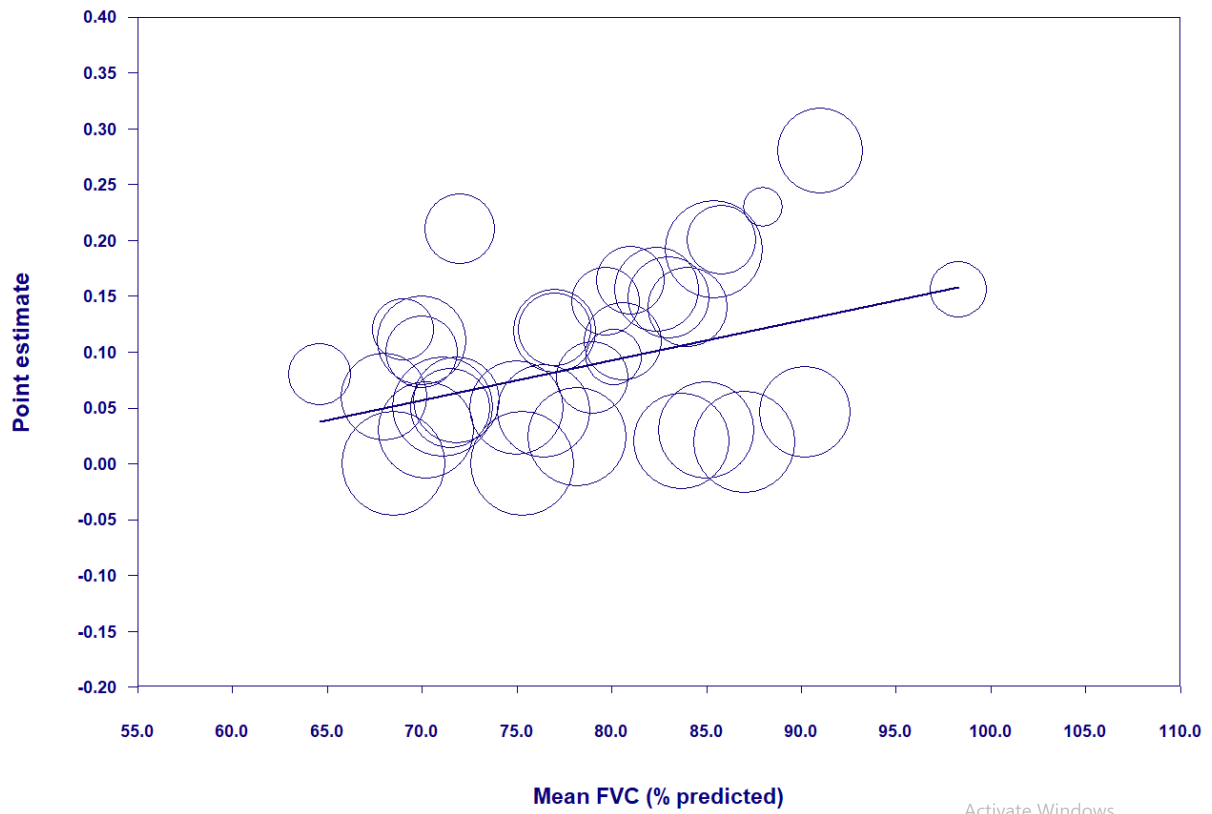

Activate Windows

## Supplementary Figure 17: Bleeding by Probe Size

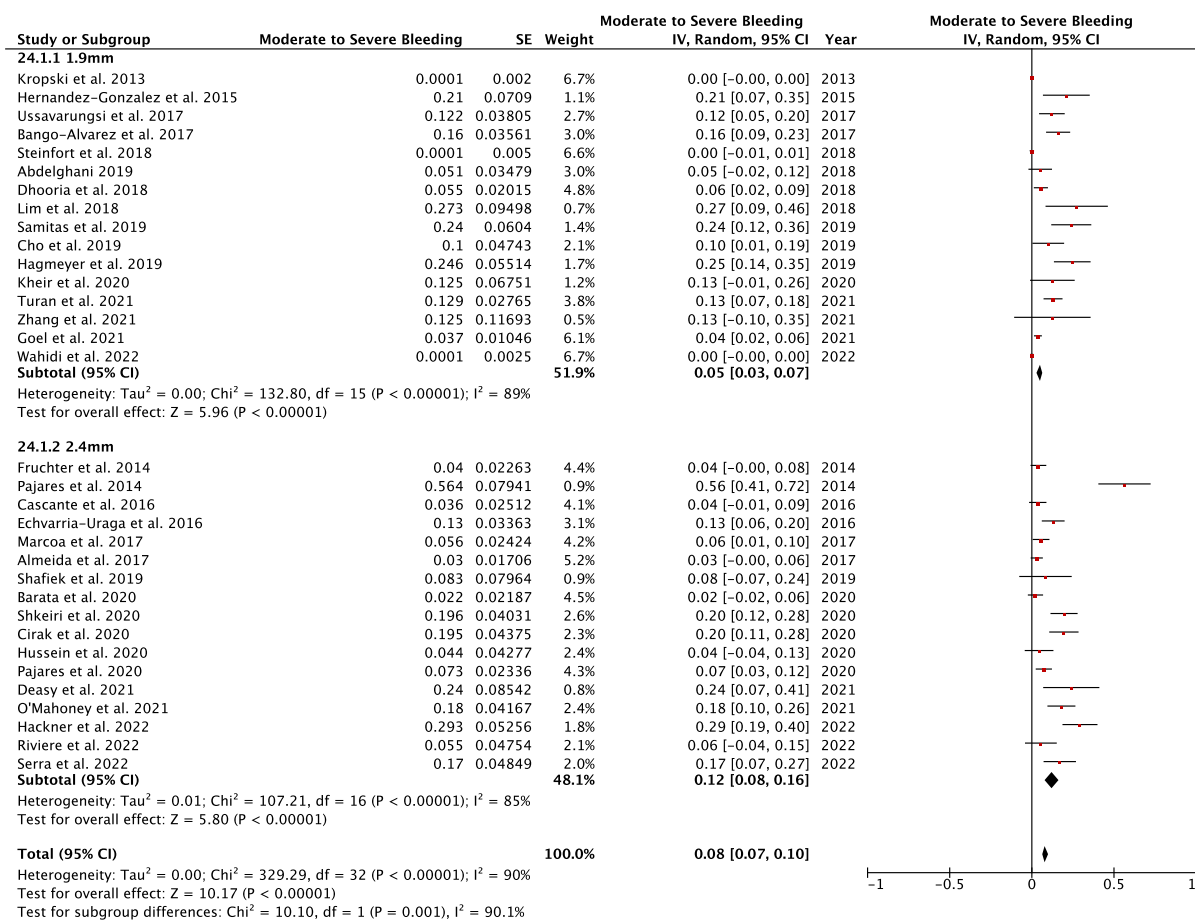

## Supplementary Figure 18: Bleeding by Bleeding Score

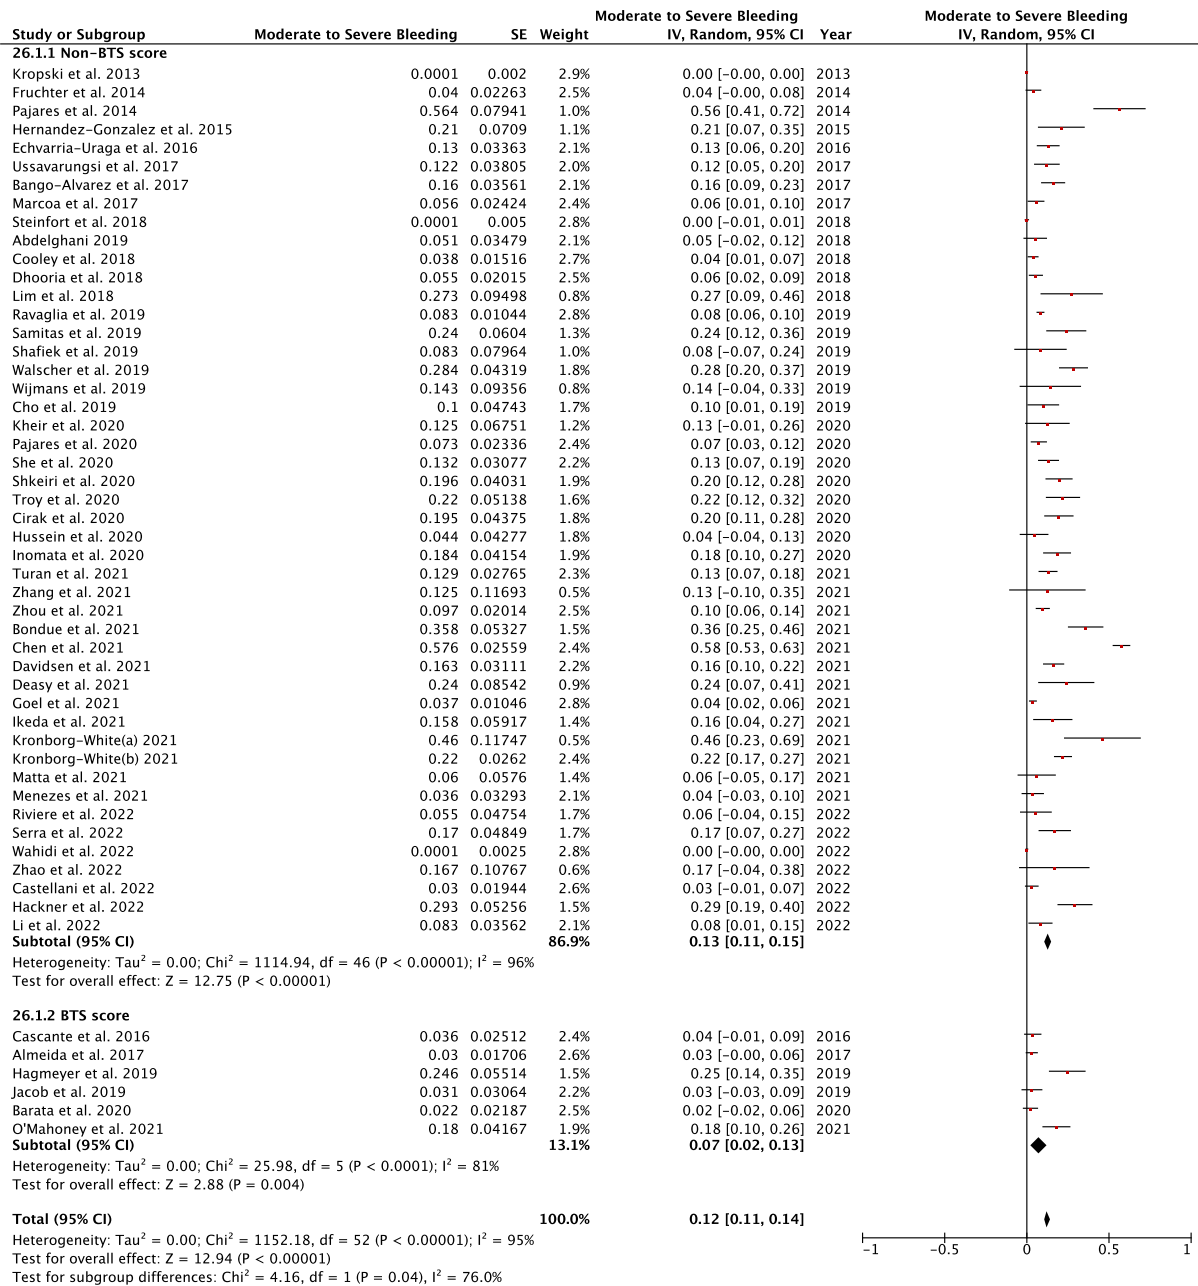

## Supplementary Figure 19: Severe Bleeding

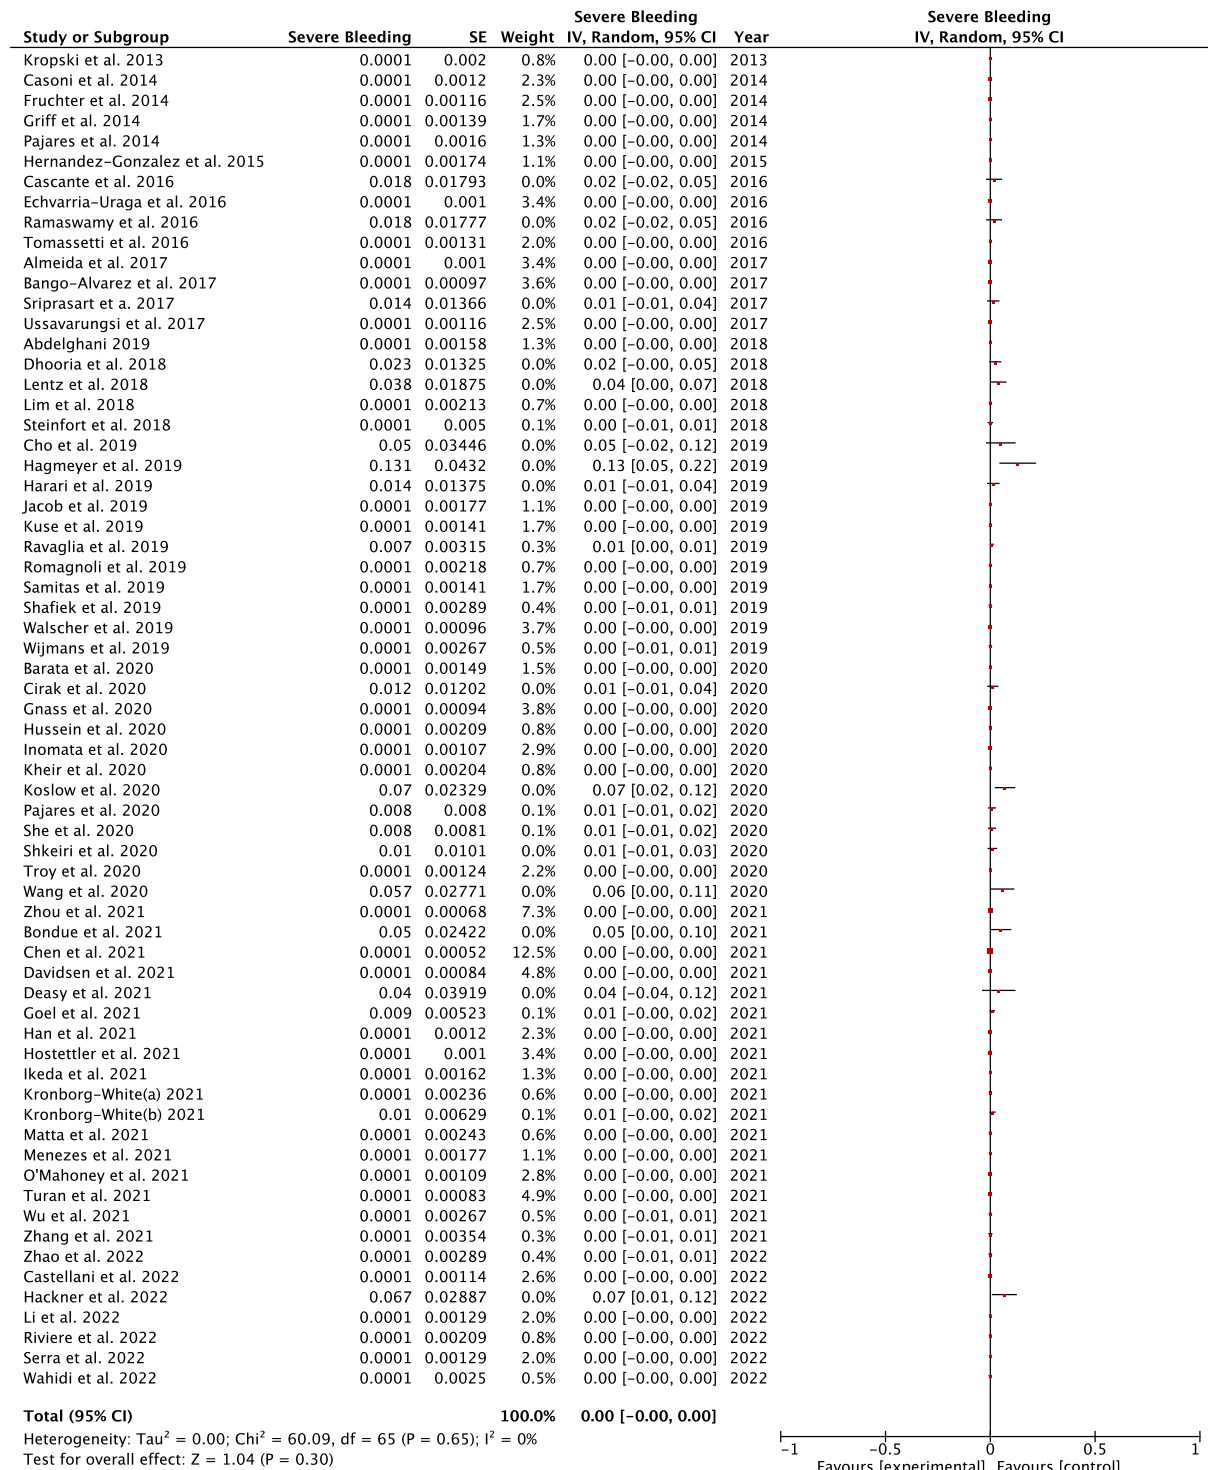

Supplement: ERR-0035-2024.SUPPLEMENT.pdf [file ERR-0035-2024.SUPPLEMENT.pdf]
