# Supplementary material for: A systematic review of procedural and sampling techniques for cryobiopsy in interstitial lung disease
Source: PubMed Central journal article supplement — Eur Respir Rev. 2024 Aug 14;33(173):240035. doi: 10.1183/16000617.0035-2024 (PMC11322826; doi:10.1183/16000617.0035-2024), 2024-08-14
Supplement: ERR-0035-2024.SUPPLEMENT2.pdf [file ERR-0035-2024.SUPPLEMENT2.pdf]

**Supplementary Table S1: Study Characteristics**

| Name                      | Year | Country     | Participants | Design        | Mean FVC (% predicted) | Mean DLCO (% predicted) |
|---------------------------|------|-------------|--------------|---------------|------------------------|-------------------------|
| Abdelghani et al.         | 2019 | USA         | 40           | Prospective   | 71.5                   | 54.3                    |
| Aburto et al.             | 2020 | Spain       | 257          | Prospective   | 87                     | 64.5                    |
| Almeida et al.            | 2017 | Portugal    | 100          | Retrospective | .                      | .                       |
| Babiak et al.             | 2009 | Germany     | 41           | Retrospective | .                      | .                       |
| Bango-Alvarez et al.      | 2017 | Spain       | 106          | Prospective   | 76.4                   | 66.7                    |
| Barata et al.             | 2020 | Portugal    | 45           | Retrospective | .                      | 52                      |
| Bondue et al.             | 2021 | Belgium     | 96           | Prospective   | 72                     | 51                      |
| Cascante et al.           | 2016 | Spain       | 55           | Prospective   | 79.7                   | 52.2                    |
| Casoni et al.             | 2014 | Italy       | 69           | Prospective   | .                      | .                       |
| Castellani et al.         | 2022 | USA         | 77           | Prospective   | 68                     | 60                      |
| Chen et al.               | 2021 | China       | 373          | Prospective   | 71.1                   | 53.5                    |
| Cho et al.                | 2019 | USA         | 40           | Retrospective | 68.5                   | 64.4                    |
| Cirak et al.              | 2020 | Turkey      | 82           | Retrospective | .                      | .                       |
| Cooley et al.             | 2018 | USA         | 159          | Retrospective | 70                     | 60                      |
| Daidsen et al.            | 2021 | Denmark     | 141          | Prospective   | .                      | .                       |
| Deasy et al.              | 2021 | Ireland     | 25           | Retrospective | .                      | .                       |
| Dhooia et al.             | 2018 | India       | 128          | Retrospective | .                      | .                       |
| Echevarria-Uraga et al.   | 2016 | Spain       | 100          | Retrospective | 85                     | 66                      |
| Fruchter et al.           | 2014 | Israel      | 75           | Retrospective | .                      | .                       |
| Gnass et al.              | 2020 | Poland      | 114          | Prospective   | .                      | .                       |
| Goel et al.               | 2021 | India       | 326          | Retrospective | .                      | .                       |
| Griff et al.              | 2014 | Germany     | 52           | Retrospective | .                      | .                       |
| Hackner et al.            | 2022 | Austria     | 75           | Prospective   | 85.8                   | 67                      |
| Hagmeyer et al.           | 2019 | Germany     | 61           | Prospective   | 81                     | 63                      |
| Han et al.                | 2021 | China       | 70           | Prospective   | 71.8                   | 47.2                    |
| Harari et al.             | 2019 | Italy       | 73           | Retrospective | 80.6                   | 53.5                    |
| Hernandez-Gonzalez et al. | 2015 | Spain       | 33           | Retrospective | 69                     | 50                      |
| Hostettler et al.         | 2021 | Switzerland | 100          | Retrospective | 84                     | 61                      |
| Hussein et al.            | 2020 | Egypt       | 23           | Prospective   | .                      | .                       |
| Ikeda et al.              | 2021 | Japan       | 38           | Prospective   | .                      | .                       |
| Inomata et al.            | 2020 | Japan       | 87           | Prospective   | 90.2                   | 73.1                    |
| Jacob et al.              | 2019 | Portugal    | 32           | Retrospective | 98.3                   | 76.3                    |
| Kheir et al.              | 2020 | USA         | 24           | Retrospective | 64.6                   | 49.1                    |
| Koslow et al.             | 2020 | USA         | 120          | Retrospective | 75                     | 51                      |
| Kronborg-White et al. (a) | 2021 | Denmark     | 18           | Prospective   | 88                     | 69                      |
| Kronborg-White et al. (b) | 2021 | Denmark     | 250          | Prospective   | 91                     | 59                      |
| Kropski et al.            | 2013 | USA         | 25           | Retrospective | 75.3                   | 66.2                    |

|                     |      |                |     |               |      |      |
|---------------------|------|----------------|-----|---------------|------|------|
| Kuse et al.         | 2019 | Japan          | 50  | Retrospective | .    | .    |
| Lentz et al.        | 2018 | USA            | 104 | Retrospective | 70.2 | 59.1 |
| Lim et al.          | 2018 | Singapore      | 22  | Prospective   | .    | .    |
| Li et al.           | 2022 | China          | 60  | Retrospective | .    | .    |
| Marcoa et al.       | 2017 | Portugal       | 90  | Prospective   | .    | .    |
| Matta et al.        | 2021 | USA            | 17  | Retrospective | .    | .    |
| Menezes et al.      | 2021 | Canada         | 32  | Retrospective | .    | .    |
| O'Mahony et al.     | 2021 | Ireland        | 85  | Retrospective | .    | .    |
| Pajares et al.      | 2020 | Spain          | 124 | Prospective   | 79   | 57.7 |
| Pajares et al.      | 2014 | Spain          | 39  | Prospective   | 78.2 | 67.5 |
| Ramaswamy et al.    | 2016 | USA            | 56  | Retrospective | .    | .    |
| Ravaglia et al.     | 2019 | Italy          | 699 | Retrospective | 85.4 | 61.2 |
| Riviere et al.      | 2022 | France         | 23  | Retrospective | .    | .    |
| Romagnoli et al.    | 2019 | France & Italy | 21  | Prospective   | 80.1 | 52.2 |
| Samitas et al.      | 2019 | Greece         | 50  | Retrospective | 70   | 63   |
| Serra et al.        | 2022 | Spain          | 60  | Retrospective | 77   | 65   |
| Shafiek et al.      | 2019 | Egypt          | 12  | Prospective   | .    | .    |
| She et al.          | 2020 | Australia      | 121 | Retrospective | 83   | 60   |
| Shkeiri et al.      | 2020 | Israel         | 97  | Retrospective | .    | .    |
| Sriprasart et al.   | 2017 | USA            | 74  | Retrospective | .    | .    |
| Steinfort et al.    | 2018 | Australia      | 4   | Prospective   | .    | .    |
| Tomassetti et al.   | 2016 | Italy          | 58  | Retrospective | .    | .    |
| Troy et al.         | 2020 | Australia      | 65  | Prospective   | 83.7 | 63.4 |
| Turan et al.        | 2021 | Turkey         | 147 | Retrospective | 82.4 | 59   |
| Ussavarungsi et al. | 2017 | USA            | 74  | Retrospective | .    | .    |
| Wahidi et al.       | 2022 | USA            | 16  | Prospective   | .    | .    |
| Walscher et al.     | 2019 | Germany        | 109 | Retrospective | 77   | 51   |
| Wang et al.         | 2020 | China          | 70  | Prospective   | .    | .    |
| Wijmans et al.      | 2019 | Netherlands    | 14  | Prospective   | .    | .    |
| Wu et al.           | 2021 | China          | 14  | Retrospective | .    | .    |
| Zhang et al.        | 2021 | China          | 8   | Prospective   | .    | .    |
| Zhao et al.         | 2022 | China          | 12  | Prospective   | .    | 65.7 |
| Zhou et al.         | 2021 | China          | 216 | Prospective   | .    | .    |

**Supplementary Table S2: Reporting of Procedural and Sampling Variables during Cryobiopsy**

| Variable                                                                                                  | No. of studies (%)  | References                                                                                                                                                                                                                                                                                                                                                              |
|-----------------------------------------------------------------------------------------------------------|---------------------|-------------------------------------------------------------------------------------------------------------------------------------------------------------------------------------------------------------------------------------------------------------------------------------------------------------------------------------------------------------------------|
| <b>BIOPSY CHARACTERISTICS</b>                                                                             |                     |                                                                                                                                                                                                                                                                                                                                                                         |
| The target number of biopsies was described                                                               | 35 studies (50%)    | 1 biopsy (23)<br>2 biopsies (34, 39, 46, 47, 57, 58, 64, 65, 66, 74)<br>3 biopsies (21, 25, 26, 30, 33, 61, 68, 75, 76, 77)<br>4 biopsies (22, 50, 54, 60, 67, 78)<br>5 or more biopsies (13, 37, 38, 44, 52, 56, 79, 80)                                                                                                                                               |
| The lower lobes were targeted for biopsy over upper or middle lobes                                       | 18 studies (25.7%)  | (24, 28, 33, 34, 37, 38, 40, 42, 52, 53, 56, 59, 64, 68, 73, 76, 81, 82)                                                                                                                                                                                                                                                                                                |
| Cryoprobe size was describes (for 1.9mm size and 2.4mm size, see Supplementary Figure )                   | 67 studies (95.7%)  | Variable size used between cases (12, 36, 40, 43, 45, 47, 48, 50, 58, 63, 65, 67, 69, 71, 72, 80, 83, 84, 85)<br>Small cryoprobe (1.5, 1.7 or 1.8mm) (43, 45, 72)                                                                                                                                                                                                       |
| An estimate of freezing time was described                                                                | 58 studies (82.9%)  | (12, 13, 21, 22, 23, 24, 25, 26, 28, 29, 30, 31, 33, 36, 37, 38, 39, 40, 42, 43, 46, 47, 48, 49, 52, 53, 54, 55, 56, 57, 58, 59, 60, 61, 62, 63, 65, 66, 68, 69, 71, 72, 73, 74, 75, 76, 77, 78, 79, 80, 81, 82, 83, 84, 85, 86, 87, 88)                                                                                                                                |
| <b>BLEEDING</b>                                                                                           |                     |                                                                                                                                                                                                                                                                                                                                                                         |
| An endobronchial balloon blocker was routinely used in all cases                                          | 39 studies (55.7%), | (12, 13, 14, 24, 25, 26, 28, 29, 30, 33, 34, 36, 40, 41, 42, 46, 47, 48, 50, 51, 53, 55, 56, 57, 58, 60, 61, 64, 65, 67, 71, 72, 74, 76, 77, 78, 82, 84, 86)                                                                                                                                                                                                            |
| An endobronchial balloon blocker was used as required                                                     | 9 studies (12.9%)   | (22, 31, 37, 39, 43, 54, 73, 79, 81, 83)                                                                                                                                                                                                                                                                                                                                |
| A description was provided of bleeding score used by the study (any)                                      | 58 studies (82.9%)  | (12, 13, 21, 23, 24, 25, 26, 27, 28, 29, 30, 31, 32, 33, 34, 36, 37, 38, 39, 40, 41, 42, 43, 44, 45, 46, 47, 48, 49, 51, 52, 54, 55, 56, 57, 60, 61, 62, 63, 64, 67, 68, 69, 71, 72, 73, 74, 77, 78, 80, 81, 82, 83, 84, 85, 86, 87, 88)                                                                                                                                |
| Use of the British Thoracic Society bleeding score                                                        | 7 studies (10%)     | (27, 28, 29, 30, 31, 32, 33)                                                                                                                                                                                                                                                                                                                                            |
| Routine administration of an agent to prevent bleeding                                                    | 8 studies (11.4%)   | Topical adrenaline/epinephrine (30, 37, 40)<br>Intravenous tranexamic acid (39, 50)<br>Topical tranexamic acid (86)<br>Topical phenylephrine(45)                                                                                                                                                                                                                        |
| <b>ANAESTHETIC CHARACTERISTICS</b>                                                                        |                     |                                                                                                                                                                                                                                                                                                                                                                         |
| A secure airway was reported                                                                              | 54 studies (77.1%)  | Endotracheal tube (12, 13, 21, 22, 23, 25, 30, 31, 34, 36, 41, 42, 45, 46, 48, 50, 51, 56, 58, 59, 61, 62, 63, 64, 65, 66, 68, 69, 72, 73, 74, 78, 80, 82, 83, 84, 86, 89)<br>Laryngeal mask airway (26, 36, 39, 43, 44, 49, 63, 64, 76, 80)<br>Rigid bronchoscope (12, 14, 24, 26, 32, 36, 47, 48, 49, 54, 57, 60, 64, 72, 84, 85)<br>Tracheoscope(29, 53, 55, 71, 90) |
| Variable anaesthesia modality (for general anaesthesia use vs sedation, see Supplementary Figure 5)       | 3 studies (4.3%)    | (36, 76, 83)                                                                                                                                                                                                                                                                                                                                                            |
| <b>RADIOLOGIC ASSESSMENT</b>                                                                              |                     |                                                                                                                                                                                                                                                                                                                                                                         |
| Routine post-procedure imaging was acquired                                                               | 44 studies (62.9%)  | Chest radiography (22, 23, 24, 28, 29, 30, 32, 33, 34, 38, 39, 42, 43, 45, 46, 48, 49, 50, 52, 53, 55, 56, 57, 58, 62, 63, 64, 65, 68, 69, 71, 72, 75, 76, 78, 79, 80, 81, 83, 85, 88)<br>Fluoroscopy (12, 26, 50)<br>Thoracic ultrasound (11, 50, 69)<br>Cone beam computed tomography (47, 48)                                                                        |
| Radiological features on computed tomography were described in relation to dominant radiological features | 9 (12.9%)           | (22, 29, 32, 48, 56, 63, 76, 80, 88)                                                                                                                                                                                                                                                                                                                                    |
| Radiological features were described in relation to a dominant radiological pattern                       | 10 studies (14.3%)  | (21, 26, 27, 45, 50, 52, 53, 65, 73, 91)                                                                                                                                                                                                                                                                                                                                |

| <b>PRE-PROCEDURE PATIENT CHARACTERISTICS &amp; ASSESSMENT</b>                                                            |                    |                                                                                                                                                                                                                                                              |
|--------------------------------------------------------------------------------------------------------------------------|--------------------|--------------------------------------------------------------------------------------------------------------------------------------------------------------------------------------------------------------------------------------------------------------|
| Criteria were specified in relation to the use of antiplatelet and/or anticoagulant medication                           | 27 studies (38.6%) | (11, 13, 21, 25, 26, 27, 34, 40, 42, 43, 44, 48, 49, 50, 52, 55, 56, 57, 61, 63, 64, 65, 66, 73, 83, 84, 85)                                                                                                                                                 |
| A description of patient comorbidities was reported                                                                      | 15 studies (21.4%) | (12, 22, 25, 27, 36, 40, 41, 44, 45, 49, 57, 63, 69, 78, 79)                                                                                                                                                                                                 |
| A description of pre-procedural anaesthetic evaluation was reported (e.g. ASA score)                                     | 14 studies (20%)   | (24, 27, 29, 30, 37, 39, 45, 53, 63, 64, 69, 80, 81, 88)                                                                                                                                                                                                     |
| Lung function parameters were defined as contra-indication to cryobiopsy                                                 | 22 studies (31.4%) | (12, 14, 21, 22, 26, 28, 29, 32, 39, 41, 43, 44, 50, 52, 53, 54, 55, 56, 57, 58, 60, 92)                                                                                                                                                                     |
| A transthoracic echocardiogram was performed prior to cryobiopsy (routine or as required)                                | 26 studies (37.1%) | (12, 14, 22, 23, 25, 26, 27, 28, 32, 37, 41, 45, 50, 52, 53, 56, 57, 58, 60, 61, 64, 67, 68, 76, 78, 85)                                                                                                                                                     |
| Echocardiographic parameters were described as a contra-indication to cryobiopsy<br>e.g. RVSP or PAP cut-off >40-50 mmHg | 14 studies (20%)   | (12, 14, 22, 23, 28, 39, 41, 53, 56, 57, 58, 64, 67, 85)                                                                                                                                                                                                     |
| INR cut-off (>1.5 international units)                                                                                   | 16 studies (22.9%) | (9, 10, 13, 14, 18, 20, 27, 28, 29, 30, 38, 40, 43, 58, 60, 61)                                                                                                                                                                                              |
| INR cut-off (other or unspecified)                                                                                       | 10 studies (14.3%) | (12, 23, 24, 29, 36, 52, 64, 76, 83, 85)                                                                                                                                                                                                                     |
| Platelet count cut-off (<50,000-100,000 per microlitre)                                                                  | 24 studies (34.3%) | (13, 14, 21, 22, 26, 27, 28, 30, 32, 34, 36, 37, 39, 41, 43, 45, 48, 49, 53, 57, 58, 64, 67, 79)                                                                                                                                                             |
| Platelet count cut-off (other or unspecified)                                                                            | 8 studies (11.4%)  | (12, 23, 24, 29, 52, 76, 83, 85)                                                                                                                                                                                                                             |
| <b>GENERAL PROCEDURAL CHARACTERISTICS</b>                                                                                |                    |                                                                                                                                                                                                                                                              |
| Procedure duration was reported                                                                                          | 15 studies (21.4%) | (23, 26, 30, 37, 38, 40, 52, 54, 64, 75, 76, 78, 80, 85, 88)                                                                                                                                                                                                 |
| Length of stay was reported                                                                                              | 11 studies (15.7%) | (12, 30, 33, 53, 65, 66, 78, 84, 85, 90, 93)                                                                                                                                                                                                                 |
| Cryobiopsy was performed as an outpatient procedure (some or all cases)                                                  | 35 studies (50%)   | (23, 24, 25, 29, 32, 33, 34, 37, 39, 41, 45, 46, 51, 53, 54, 56, 58, 59, 62, 63, 64, 65, 66, 68, 73, 75, 76, 78, 80, 81, 82, 83, 84, 86, 87)                                                                                                                 |
| A description of proceduralist training or qualifications was reported                                                   | 27 studies (38.6%) | (12, 13, 24, 29, 30, 33, 34, 37, 38, 39, 41, 50, 52, 55, 56, 58, 59, 63, 64, 66, 69, 73, 79, 80, 81, 83, 86)                                                                                                                                                 |
| <b>PATHOLOGY CHARACTERISTICS</b>                                                                                         |                    |                                                                                                                                                                                                                                                              |
| The number of reporting pathologists was specified                                                                       | 25 studies (35.7%) | (13, 14, 21, 29, 33, 34, 37, 38, 40, 41, 44, 50, 52, 53, 56, 63, 64, 67, 71, 73, 75, 78, 85, 87, 90)                                                                                                                                                         |
| A report of histologic diagnostic confidence was specified                                                               | 13 studies (18.6%) | (12, 31, 40, 42, 50, 53, 54, 63, 67, 73, 74, 78, 90)                                                                                                                                                                                                         |
| A report of histological patterns was specified                                                                          | 63 studies (90%)   | (12, 13, 14, 21, 22, 23, 24, 25, 26, 28, 29, 30, 32, 33, 34, 36, 37, 38, 39, 40, 41, 42, 43, 44, 45, 47, 48, 49, 50, 51, 52, 53, 54, 55, 56, 57, 58, 59, 60, 61, 62, 63, 64, 65, 66, 67, 68, 69, 71, 72, 73, 74, 75, 76, 77, 78, 80, 82, 83, 84, 87, 88, 90) |
| A report of specimen quality assessment was specified                                                                    | 28 studies (40%)   | (13, 14, 21, 22, 23, 28, 29, 32, 33, 37, 38, 39, 40, 42, 43, 50, 52, 53, 56, 66, 69, 73, 74, 75, 78, 80, 87, 90)                                                                                                                                             |
| Any measurement of biopsy size (mean or median, diameter or area) was included                                           | 44 studies (62.9%) | (13, 14, 21, 22, 23, 28, 29, 30, 32, 33, 34, 36, 37, 39, 41, 43, 47, 50, 52, 53, 54, 55, 56, 57, 58, 59, 61, 62, 63, 66, 67, 69, 71, 72, 73, 75, 76, 77, 78, 80, 82, 85, 87, 88)                                                                             |
| A definition was provided of diagnostic yield                                                                            | 39 studies (55.7%) | (14, 22, 24, 25, 28, 32, 33, 34, 36, 37, 38, 39, 40, 45, 46, 50, 53, 55, 56, 57, 58, 59, 60, 63, 64, 65, 66, 68, 69, 72, 73, 74, 78, 81, 82, 86, 87, 88, 90)                                                                                                 |
