# Supplementary material for: A systematic review of procedural and sampling techniques for cryobiopsy in interstitial lung disease
Source: PubMed Central journal article supplement — Eur Respir Rev. 2024 Aug 14;33(173):240035. doi: 10.1183/16000617.0035-2024 (PMC11322826; doi:10.1183/16000617.0035-2024), 2024-08-14
Supplement: ERR-0035-2024.SUPPLEMENT3.pdf [file ERR-0035-2024.SUPPLEMENT3.pdf]

**Supplementary Table S3: Quality Assessments – QUADAS-2**

| STUDY             | Year | QUADAS-2 |      |      |      |      |      |         |
|-------------------|------|----------|------|------|------|------|------|---------|
|                   |      | RoB1     | RoB2 | RoB3 | RoB4 | App1 | App2 | App3    |
| Abdelghani et al. | 2019 | Low      | Low  | High | High | Low  | Low  | Unclear |
| Aburto et al.     | 2020 | Low      | Low  | High | High | Low  | Low  | Unclear |
| Almeida           | 2017 | Low      | Low  | High | High | Low  | Low  | Unclear |
| Babiak            | 2009 | Low      | Low  | High | High | Low  | Low  | Unclear |
| Bango-Alvarez     | 2017 | Unclear  | Low  | High | High | Low  | Low  | Unclear |
| Barata            | 2020 | Low      | Low  | High | High | Low  | Low  | Unclear |
| Bondue            | 2021 | High     | Low  | Low  | High | High | Low  | Low     |
| Cascante          | 2016 | Low      | Low  | High | High | Low  | Low  | Unclear |
| Casoni            | 2014 | Unclear  | Low  | Low  | High | Low  | Low  | Low     |
| Castellani        | 2022 | Low      | Low  | High | High | Low  | Low  | Unclear |
| Chen              | 2021 | Low      | Low  | High | High | Low  | Low  | Unclear |
| Cho               | 2019 | Low      | Low  | High | High | Low  | Low  | Unclear |
| Cirak             | 2020 | Low      | Low  | High | Low  | Low  | Low  | Low     |
| Cooley            | 2018 | Low      | Low  | High | High | Low  | Low  | Unclear |
| Dauidsen          | 2021 | Low      | Low  | High | High | Low  | Low  | Unclear |
| Deasy             | 2021 | Low      | Low  | High | High | Low  | Low  | Unclear |
| Dhooia            | 2018 | Low      | Low  | High | High | Low  | Low  | Unclear |
| Echevarria-Uraga  | 2016 | Low      | Low  | High | High | Low  | Low  | Unclear |
| Fruchter          | 2014 | Low      | Low  | High | High | Low  | Low  | Unclear |
| Gnass             | 2020 | Low      | Low  | High | High | Low  | Low  | Unclear |
| Goel              | 2021 | Low      | Low  | High | High | Low  | Low  | Unclear |
| Griff             | 2014 | High     | Low  | High | High | Low  | Low  | Unclear |
| Hackner           | 2022 | High     | Low  | High | High | Low  | Low  | Unclear |



|              |      |      |     |      |      |     |     |         |
|--------------|------|------|-----|------|------|-----|-----|---------|
| Romero       | 2020 | Low  | Low | High | High | Low | Low | Unclear |
| Samitas      | 2019 | Low  | Low | High | High | Low | Low | Unclear |
| Serra        | 2022 | Low  | Low | High | High | Low | Low | Unclear |
| She          | 2020 | Low  | Low | high | High | Low | Low | Unclear |
| Shkeiri      | 2020 | Low  | Low | High | High | Low | Low | Unclear |
| Sriprasart   | 2017 | High | Low | High | High | Low | Low | Low     |
| Steinfort    | 2018 | High | Low | High | High | Low | Low | Unclear |
| Tomasseti    | 2016 | High | Low | Low  | High | Low | Low | Low     |
| Troy         | 2020 | Low  | Low | Low  | Low  | Low | Low | Low     |
| Turan        | 2021 | Low  | Low | High | High | Low | Low | Low     |
| Ussavarungsi | 2017 | Low  | Low | High | High | Low | Low | Unclear |
| Wahidi       | 2022 | Low  | Low | Low  | Low  | Low | Low | Low     |
| Walscher     | 2019 | Low  | Low | High | High | Low | Low | Unclear |
| Wang         | 2020 | Low  | Low | High | High | Low | Low | Unclear |
| Wijmans      | 2019 | Low  | Low | High | High | Low | Low | Low     |
| Wu           | 2021 | High | Low | High | High | Low | Low | Unclear |
| Zhang        | 2021 | Low  | Low | High | High | Low | Low | Unclear |
| Zhao         | 2022 | High | Low | High | High | Low | Low | Unclear |
| Zhou         | 2021 | Low  | Low | High | High | Low | Low | Unclear |

**Supplementary Table S4: Quality Assessments – Newcastle-Ottawa Scale for Cohort Studies**

| STUDY<br>Author   | Year | RISK OF BIAS ASSESSMENT (NON-RANDOMISED): Newcastle-Ottawa Scale - Cohort Studies |          |    |          |          |    |    |    | Overall   |
|-------------------|------|-----------------------------------------------------------------------------------|----------|----|----------|----------|----|----|----|-----------|
|                   |      | S1                                                                                | S2*      | S3 | S4       | C1**     | O1 | O2 | O3 |           |
| Abdelghani et al. | 2019 | ☆                                                                                 | ☆        | ☆  | No stars | ☆☆       | ☆  | ☆  | ☆  | 8 stars   |
| Aburto et al.     | 2020 | ☆                                                                                 | ☆        | ☆  | No stars | ☆☆       | ☆  | ☆  | ☆  | 8 stars   |
| Almeida           | 2017 | ☆                                                                                 | ☆        | ☆  | No stars | ☆☆       | ☆  | ☆  | ☆  | 8 stars   |
| Babiak            | 2009 | No stars                                                                          | ☆        | ☆  | No stars | ☆☆       | ☆  | ☆  | ☆  | 7 stars   |
| Bango-Alvarez     | 2017 | ☆                                                                                 | No stars | ☆  | No stars | ☆        | ☆  | ☆  | ☆  | 6 stars   |
| Barata            | 2020 | No stars                                                                          | ☆        | ☆  | No stars | ☆☆       | ☆  | ☆  | ☆  | 7 stars   |
| Bondue            | 2021 | ☆                                                                                 | No stars | ☆  | No stars | ☆        | ☆  | ☆  | ☆  | 6 stars   |
| Cascante          | 2016 | ☆                                                                                 | ☆        | ☆  | No stars | ☆☆       | ☆  | ☆  | ☆  | 8 stars   |
| Casoni            | 2014 | ☆                                                                                 | No stars | ☆  | No stars | ☆        | ☆  | ☆  | ☆  | 6 stars   |
| Castellani        | 2022 | ☆                                                                                 | ☆        | ☆  | No stars | ☆☆       | ☆  | ☆  | ☆  | 8 stars   |
| Chen              | 2021 | ☆                                                                                 | ☆        | ☆  | No stars | ☆☆       | ☆  | ☆  | ☆  | 8 studies |
| Cho               | 2019 | ☆                                                                                 | ☆        | ☆  | No stars | ☆☆       | ☆  | ☆  | ☆  | 8 stars   |
| Cirak             | 2020 | ☆                                                                                 | ☆        | ☆  | No stars | ☆☆       | ☆  | ☆  | ☆  | 8 stars   |
| Cooley            | 2018 | ☆                                                                                 | ☆        | ☆  | No stars | ☆☆       | ☆  | ☆  | ☆  | 8 stars   |
| Daidsen           | 2021 | ☆                                                                                 | ☆        | ☆  | No stars | ☆☆       | ☆  | ☆  | ☆  | 8 stars   |
| Deasy             | 2021 | ☆                                                                                 | ☆        | ☆  | No stars | ☆☆       | ☆  | ☆  | ☆  | 8 stars   |
| Dhooia            | 2018 | ☆                                                                                 | ☆        | ☆  | No stars | ☆☆       | ☆  | ☆  | ☆  | 8 stars   |
| Echevarria-Uraga  | 2016 | ☆                                                                                 | ☆        | ☆  | No stars | ☆☆       | ☆  | ☆  | ☆  | 8 stars   |
| Fruchter          | 2014 | ☆                                                                                 | ☆        | ☆  | No stars | ☆☆       | ☆  | ☆  | ☆  | 8 stars   |
| Gnass             | 2020 | ☆                                                                                 | ☆        | ☆  | No stars | ☆☆       | ☆  | ☆  | ☆  | 8 stars   |
| Goel              | 2021 | ☆                                                                                 | ☆        | ☆  | No stars | ☆☆       | ☆  | ☆  | ☆  | 8 stars   |
| Griff             | 2014 | ☆                                                                                 | No stars | ☆  | No stars | No stars | ☆  | ☆  | ☆  | 5 stars   |
| Hackner           | 2022 | ☆                                                                                 | No stars | ☆  | No stars | ☆        | ☆  | ☆  | ☆  | 6 stars   |

|                    |      |          |          |   |          |          |   |   |   |         |
|--------------------|------|----------|----------|---|----------|----------|---|---|---|---------|
| Hagmeyer           | 2019 | ★        | No stars | ★ | No stars | ★        | ★ | ★ | ★ | 6 stars |
| Han                | 2021 | ★        | ★        | ★ | No stars | ★★       | ★ | ★ | ★ | 8 stars |
| Harari             | 2019 | ★        | No stars | ★ | No stars | ★        | ★ | ★ | ★ | 6 stars |
| Hernandez-Gonzalez | 2015 | ★        | ★        | ★ | No stars | ★★       | ★ | ★ | ★ | 8 stars |
| Hostettler         | 2021 | No stars | No stars | ★ | No stars | ★        | ★ | ★ | ★ | 5 stars |
| Hussein            | 2020 | ★        | ★        | ★ | No stars | ★        | ★ | ★ | ★ | 7 stars |
| Ikeda              | 2021 | ★        | ★        | ★ | No stars | ★★       | ★ | ★ | ★ | 8 stars |
| Inomata            | 2020 | ★        | ★        | ★ | No stars | ★        | ★ | ★ | ★ | 7 stars |
| Jacob              | 2019 | ★        | ★        | ★ | No stars | ★★       | ★ | ★ | ★ | 7 stars |
| Kheir              | 2020 | ★        | ★        | ★ | No stars | ★★       | ★ | ★ | ★ | 8 stars |
| Koslow             | 2020 | ★        | ★        | ★ | No stars | ★★       | ★ | ★ | ★ | 8 stars |
| Kronborg-White     | 2021 | ★        | ★        | ★ | No stars | ★        | ★ | ★ | ★ | 7 stars |
| Kronborg-White     | 2021 | ★        | ★        | ★ | No stars | ★★       | ★ | ★ | ★ | 8 stars |
| Kropski            | 2013 | ★        | ★        | ★ | ★        | ★★       | ★ | ★ | ★ | 8 stars |
| Kuse               | 2019 | ★        | ★        | ★ | No stars | ★★       | ★ | ★ | ★ | 8 stars |
| Lentz              | 2018 | ★        | ★        | ★ | No stars | ★★       | ★ | ★ | ★ | 8 stars |
| Lim                | 2018 | ★        | ★        | ★ | No stars | ★★       | ★ | ★ | ★ | 8 stars |
| Li                 | 2022 | ★        | ★        | ★ | No stars | ★        | ★ | ★ | ★ | 7 stars |
| Marcoa             | 2017 | ★        | ★        | ★ | No stars | ★★       | ★ | ★ | ★ | 8 stars |
| Matta              | 2021 | No stars | ★        | ★ | No stars | No stars | ★ | ★ | ★ | 5 stars |
| Menezes            | 2021 | ★        | No stars | ★ | No stars | ★★       | ★ | ★ | ★ | 6 stars |
| O'Mahony           | 2021 | ★        | ★        | ★ | No stars | ★★       | ★ | ★ | ★ | 8 stars |
| Pajares            | 2020 | ★        | ★        | ★ | No stars | ★★       | ★ | ★ | ★ | 8 stars |
| Ramaswamy          | 2016 | ★        | ★        | ★ | No stars | ★★       | ★ | ★ | ★ | 8 stars |
| Ravaglia           | 2019 | ★        | ★        | ★ | No stars | air      | ★ | ★ | ★ | 8 stars |
| Riviere            | 2022 | ★        | ★        | ★ | No stars | ★★       | ★ | ★ | ★ | 8 stars |
| Romagnoli          | 2019 | ★        | ★        | ★ | No stars | ★★       | ★ | ★ | ★ | 8 stars |

|              |      |          |          |   |          |          |   |   |   |         |
|--------------|------|----------|----------|---|----------|----------|---|---|---|---------|
| Romero       | 2020 | ☆        | ☆        | ☆ | No stars | ☆☆       | ☆ | ☆ | ☆ | 8 stars |
| Samitas      | 2019 | ☆        | ☆        | ☆ | No stars | ☆☆       | ☆ | ☆ | ☆ | 8 stars |
| Serra        | 2022 | ☆        | ☆        | ☆ | No stars | ☆☆       | ☆ | ☆ | ☆ | 8 stars |
| She          | 2020 | ☆        | ☆        | ☆ | No stars | ☆☆       | ☆ | ☆ | ☆ | 8 stars |
| Shkeiri      | 2020 | ☆        | ☆        | ☆ | No stars | ☆☆       | ☆ | ☆ | ☆ | 8 stars |
| Sriprasart   | 2017 | ☆        | ☆        | ☆ | No stars | ☆☆       | ☆ | ☆ | ☆ | 8 stars |
| Steinfort    | 2018 | No stars | No stars | ☆ | No stars | ☆        | ☆ | ☆ | ☆ | 5 stars |
| Tomassetti   | 2016 | ☆        | ☆        | ☆ | No stars | ☆☆       | ☆ | ☆ | ☆ | 8 stars |
| Troy         | 2020 | ☆        | ☆        | ☆ | No stars | ☆☆       | ☆ | ☆ | ☆ | 8 stars |
| Turan        | 2021 | ☆        | ☆        | ☆ | No stars | ☆☆       | ☆ | ☆ | ☆ | 8 stars |
| Ussavarungsi | 2017 | ☆        | ☆        | ☆ | No stars | ☆☆       | ☆ | ☆ | ☆ | 8 stars |
| Wahidi       | 2022 | ☆        | ☆        | ☆ | No stars | ☆☆       | ☆ | ☆ | ☆ | 8 stars |
| Walscher     | 2019 | ☆        | ☆        | ☆ | No stars | ☆☆       | ☆ | ☆ | ☆ | 8 stars |
| Wang         | 2020 | ☆        | ☆        | ☆ | No stars | ☆☆       | ☆ | ☆ | ☆ | 8 stars |
| Wijmans      | 2019 | ☆        | ☆        | ☆ | No stars | ☆☆       | ☆ | ☆ | ☆ | 8 stars |
| Wu           | 2021 | No stars | ☆        | ☆ | No stars | No stars | ☆ | ☆ | ☆ | 5 stars |
| Zhang        | 2021 | ☆        | ☆        | ☆ | No stars | ☆☆       | ☆ | ☆ | ☆ | 8 stars |
| Zhao         | 2022 | No stars | ☆        | ☆ | No stars | ☆☆       | ☆ | ☆ | ☆ | 7 stars |
| Zhou         | 2021 | ☆        | ☆        | ☆ | No stars | ☆☆       | ☆ | ☆ | ☆ | 8 stars |

**Supplementary Table S5: Quality Assessments – RoB2**

|         |      | <b>RISK OF BIAS ASSESSMENT (RANDOMISED): RoB2</b> |               |               |          |               |          | <b>Overall risk of bias</b> |
|---------|------|---------------------------------------------------|---------------|---------------|----------|---------------|----------|-----------------------------|
|         |      | <b>1</b>                                          | <b>2</b>      | <b>3</b>      | <b>4</b> | <b>5</b>      | <b>6</b> |                             |
| Pajares | 2014 | Low                                               | Some concerns | Some concerns | Low      | Some concerns | Low      | Some concerns               |
| Shafiek | 2019 | Some concerns                                     | Some concerns | Low           | Low      | Some concerns | Low      | Some concerns               |
