# Supplementary material for: A systematic review of procedural and sampling techniques for cryobiopsy in interstitial lung disease
Source: PubMed Central journal article supplement — Eur Respir Rev. 2024 Aug 14;33(173):240035. doi: 10.1183/16000617.0035-2024 (PMC11322826; doi:10.1183/16000617.0035-2024), 2024-08-14
Supplement: ERR-0035-2024.SUPPLEMENT4.pdf [file ERR-0035-2024.SUPPLEMENT4.pdf]

## Supplementary table S6: Search Strategy

Database: Ovid MEDLINE(R) ALL <1946 to April 11, 2022>

Search Strategy:

- 
- 1 exp Lung Diseases, Interstitial/ (81083)
  - 2 ((Diffuse or Interstitial or Parenchymal) adj4 (Lung or Pneumoni\* or pulmon\* or fibro\*)).tw,kf. (50270)
  - 3 (Alveolit\* or Anti-GBM or Anti-Glomerular Basement Membrane or Histiocytos\* or Pneumoconios\* or Pulmonary Fibros\* or Pneumonit\* or Sarcoidos\* or Granulomatos\*).tw,kf. (94048)
  - 4 (Goodpasture\* Syndrome or (Lung Purpura adj Nephritis)).tw,kf. (1138)
  - 5 ((pulmonary\* or lung\* or respirat\*) adj3 (fibro\* or sarcoid\*)).tw,kf. (43244)
  - 6 (interstitial adj5 autoimmune\*).tw,kf. (411)
  - 7 (asbestos#s or silicos#s or sideros#s or byssinos#s or berylliosi#s or beryllium or brown lung or anthracosilicosis or sillicotuberculo\*).tw,kf. (15167)
  - 8 ((hypersensitiv\* or allerg\* or lymphocyt\* or granulomat\*) adj3 (lung\* or pneumon\* or pulmon\* or respirat\* or fibro\* or alveolit\*)).tw,kf. (21252)
  - 9 (pneumo#onio\* or pneumoni\* or bagassos\*).tw,kf. (216043)
  - 10 ((langerhans-cell or generali\* or type-2 or type2 or type II) adj2 (histiocyt\* or granulomat\*)).tw,kf. (5167)
  - 11 (Hashimoto-Pritzger or Histiocytosis-x or Letterer-Siwe or (Schueller adj Christian)).tw,kf. (2263)
  - 12 ((Non-Lipid or Systemic Aleukemic) adj3 Reticuloendothelio\*).tw,kf. (6)
  - 13 Eosinophilic Granuloma\*.tw,kf. (3931)
  - 14 IDF.tw,kf. (2575)
  - 15 diffuse lung\*.tw,kf. (1334)
  - 16 ((bird or budgerigar\* or pigeon) adj3 (fancier\* or breeder\*) adj2 lung\*).tw,kf. (281)
  - 17 (Avian adj3 Pneumonit\*).tw,kf. (14)
  - 18 ((farmer\* or mushroom or welder\* or polisher\*) adj3 lung\*).tw,kf. (937)
  - 19 (Trichosporon\* or Summer-Type Hypersensitiv\*).tw,kf. (2193)
  - 20 (anthracos\* or ((coal worker\* or coalworker\* or miner\* or black) adj2 (lung\* or pneumoconio\*))).tw,kf. (1804)
  - 21 Silicotuberculo\*.tw,kf. (507)
  - 22 silo filler\* disease.tw,kf. (46)
  - 23 caplans syndrome\*.tw,kf. (107)
  - 24 (Wegener\* adj2 granulomatos\*).tw,kf. (5981)
  - 25 ((idiopathic or interstitial or cryptogenic) adj3 (bronchioliti\* or alveoli\* or fibros\* or pneumoni\*)).tw,kf. (34694)
  - 26 (BOOP or Bronchiolitis Obliterans).tw,kf. (3915)
  - 27 pulmonary fibros\*.tw,kf. (22340)
  - 28 (fibros\* adj3 alveolit\*).tw,kf. (1100)
  - 29 Fibrocystic Pulmonary Dysplasia.tw,kf. (4)
  - 30 Hamman-Rich.tw,kf. (271)

- 31 or/1-30 (384415)
- 32 exp Connective tissue diseases/ (326267)
- 33 (connective tissue\* adj3 (disorder\* or disease\* or syndrome\*)).tw,kf. (17147)
- 34 ((undifferentiat\* or unclassif\* or incomplete or mixed) adj2 connectiv\*).tw,kf. (2823)
- 35 (anti-synthetase adj syndrome\*).tw,kf. (251)
- 36 ((unknow\* or uncertain\*) adj4 (origin\* or cause\* or etiolog\* or aetiolog\*)).tw,kf. (56500)
- 37 ((usual or idiopa\* or ordinary or cryptog\*) adj4 interstitial).tw,kf. (3449)
- 38 rheuma\*.tw,kf. (203432)
- 39 Sclerosis/ (9131)
- 40 (scleroderm\*or scleros\* or polymyosit\* or dermatomyosi\* or myosi\* or lupus).tw,kf. (150328)
- 41 (rheumat\* adj2 arthrit\*).tw,kf. (121446)
- 42 (dermatolys\* or dermatomegal\* or dermatomyositi\* or polymyositi\*).tw,kf. (13508)
- 43 (sjogren\* or sicca).tw,kf. (20075)
- 44 exp Sarcoidosis/ (26334)
- 45 ((boeck\* or schaumann\*) adj3 (syndrome\* or disease or sarcoid\*)).tw,kf. (1209)
- 46 (fibro\* adj2 (sarcoid\* or elastos\*)).tw,kf. (434)
- 47 or/32-46 (582414)
- 48 (lung\* or pneumon\* or pulmon\* or respirat\* or fibros\* or alveolit\*).tw,kf. (1915104)
- 49 47 and 48 (57606)
- 50 (cryobiops\* or cyro-biops\* or cryoprob\* or cryo-prob\* or cryotechnol\* or cryo-technol\* or cryo-transbronch\* or cryo-TE or cryotransbronch\* or cryoTE).tw,kf. (1564)
- 51 31 or 49 (415254)
- 52 50 and 51 (355)

\*\*\*\*\*
